# Supplementary material for: Indigenous and non-Indigenous people experiencing homelessness and mental illness in two Canadian cities: A retrospective analysis and implications for culturally informed action
Source: PubMed Central journal article supplement — BMJ Open. 2019 Apr 8;9(4):e024748. doi: 10.1136/bmjopen-2018-024748 (PMC6500294; doi:10.1136/bmjopen-2018-024748), 2019-04-08
Supplement: bmjopen-2018-024748.draft_revisions.pdf [file bmjopen-2018-024748.draft_revisions.pdf]

# BMJ Open

BMJ Open is committed to open peer review. As part of this commitment we make the peer review history of every article we publish publicly available.

When an article is published we post the peer reviewers' comments and the authors' responses online. We also post the versions of the paper that were used during peer review. These are the versions that the peer review comments apply to.

The versions of the paper that follow are the versions that were submitted during the peer review process. They are not the versions of record or the final published versions. They should not be cited or distributed as the published version of this manuscript.

BMJ Open is an open access journal and the full, final, typeset and author-corrected version of record of the manuscript is available on our site with no access controls, subscription charges or pay-per-view fees (<http://bmjopen.bmj.com>).

If you have any questions on BMJ Open's open peer review process please email [info.bmjopen@bmj.com](mailto:info.bmjopen@bmj.com)

# BMJ Open

## The Distinct Service Needs of Indigenous People Experiencing Homelessness and Mental Illness in Two Canadian Cities: Evidence to Support Culturally Informed Responses

|                               |                                                                                                                                                                                                                                                                                                                                                                                                                                                   |
|-------------------------------|---------------------------------------------------------------------------------------------------------------------------------------------------------------------------------------------------------------------------------------------------------------------------------------------------------------------------------------------------------------------------------------------------------------------------------------------------|
| Journal:                      | <i>BMJ Open</i>                                                                                                                                                                                                                                                                                                                                                                                                                                   |
| Manuscript ID                 | bmjopen-2018-024748                                                                                                                                                                                                                                                                                                                                                                                                                               |
| Article Type:                 | Research                                                                                                                                                                                                                                                                                                                                                                                                                                          |
| Date Submitted by the Author: | 16-Jun-2018                                                                                                                                                                                                                                                                                                                                                                                                                                       |
| Complete List of Authors:     | Bingham, Brittany; Simon Fraser University, Health Sciences<br>Moniruzzaman, Akm; Simon Fraser University,<br>Patterson, Michelle; Simon Fraser University, Health Sciences<br>Distasio, Jino; University of Winnipeg, Geography<br>Sareen, J; University of Manitoba, Department of Community Health<br>O'Neil, John; Simon Fraser University, Faculty of Health Sciences<br>Somers, Julian; Simon Fraser University, Faculty of Health Sciences |
| Keywords:                     | Indigenous health, Homelessness, substance use, service use, health equity, MENTAL HEALTH                                                                                                                                                                                                                                                                                                                                                         |
|                               |                                                                                                                                                                                                                                                                                                                                                                                                                                                   |

SCHOLARONE™  
Manuscripts

1  
2  
3 **The Distinct Service Needs of Indigenous People Experiencing**  
4 **Homelessness and Mental Illness in Two Canadian Cities: Evidence to**  
5 **Support Culturally Informed Responses**  
6

7  
8 **AUTHORS:**

9 **Corresponding Author:**

10 **Brittany Bingham, BA, MPH**

11 PhD Candidate

12 Simon Fraser University

13 Faculty of Health Sciences

14 8888 University Drive, Blusson Hall

15 Burnaby, BC

16 V5A1S6

17 bld@sfu.ca

18 Tel: 604-315-8865  
19

20  
21 **Akm Moniruzzaman, PhD**

22 Research Associate

23 Simon Fraser University

24 akm\_moniruzzaman@sfu.ca  
25

26 **Michelle Patterson, PhD**

27 Adjunct Professor

28 Simon Fraser University

29 Faculty of Health Sciences

30 michelle\_patterson@sfu.ca  
31

32 **Jino Distasio, PhD**

33 Director, Institute of Urban Studies

34 Vice President of Research and Innovation

35 University of Winnipeg

36 j.distasio@uwinnipeg.ca  
37

38  
39 **Jitender Sareen, MD, FRCPC**

40 Professor & Head of Psychiatry

41 Professor Psychology and Community Health Sciences

42 University of Manitoba

43 sareen@umanitoba.ca  
44

45 **John O'Neil, PhD**

46 Professor

47 Faculty of Health Sciences

48 Simon Fraser University

49 joneil@sfu.ca  
50

51  
52 **Julian M Somers, MSc, PhD, RPsych**

53 Professor

54 Simon Fraser University

55 Faculty of Health Sciences

56 jsomers@sfu.ca  
57

1  
2  
3  
4 Word Count Abstract: 243  
5

6 Word Count Body: 3592  
7  
8  
9  
10  
11  
12  
13  
14  
15  
16  
17  
18  
19  
20  
21  
22  
23  
24  
25  
26  
27  
28  
29  
30  
31  
32  
33  
34  
35  
36  
37  
38  
39  
40  
41  
42  
43  
44  
45  
46  
47  
48  
49  
50  
51  
52  
53  
54  
55  
56  
57  
58  
59  
60

For peer review only

1  
2  
3 **Key words: homelessness, Indigenous, mental health, substance use, service use**  
4

5 **ABSTRACT**

6 **OBJECTIVES:**

7 Indigenous people in Canada are not only overrepresented among the homeless population  
8 but their pathways to homelessness may differ from those of non-Indigenous people. This  
9 study investigated the history and current status of Indigenous and non-Indigenous people  
10 experiencing homelessness and mental illness. We hypothesized that compared to non-  
11 Indigenous people, those who are Indigenous would demonstrate histories of displacement  
12 earlier in life, higher rates of trauma and self-medication with alcohol and other substances.

13 **METHODS:** Retrospective data were collected from a sample recruited in Winnipeg and  
14 Vancouver. Eligibility included being 19 years or older, current mental disorder and  
15 homelessness. Univariate and multivariable models were used to model the association  
16 between Indigenous ethnicity and dependent variables.

17 **RESULTS:** A total of 1010 people met inclusion criteria, of whom 439 self-identified as  
18 Indigenous. In adjusted models, Indigenous ethnicity was independently associated with  
19 being homeless at a younger age, having a lifetime duration of homelessness longer than 3  
20 years, post-traumatic stress disorder, less severe mental disorder, more severe substance  
21 use in the past month and infectious disease. Indigenous participants were also nearly  
22 twice as likely as others (47% vs. 25%) to have children younger than 18 years.

23 **CONCLUSIONS:** Among Canadians who are homeless and mentally ill, those who are  
24 Indigenous have distinct histories and current needs that are consistent with the legacy of  
25 colonization. Responses to Indigenous homelessness must be developed within the context  
26 of reconciliation between Indigenous and non-Indigenous Canadians, addressing trauma,  
27 substance use, and family separations.  
28  
29  
30  
31

32 **Strengths and Limitations of this Study:**

- 33
- 34 • A large sample and validated self-report measures.
  - 35 • First investigation of distinct needs among homeless people related to Indigenous  
36 ethnicity.
  - 37 • Demonstration that Indigenous and non-Indigenous homeless individuals have  
38 needs that correspond to differences in their historical experiences.
  - 39 • Recollection of past events may have been incomplete or inaccurate.
  - 40 • Symptoms of mental illness and substance use may have influenced responses.
  - 41 • Indigenous ethnicity may have been underreported due to concerns regarding  
42 stigma or discrimination.  
43  
44  
45  
46  
47  
48  
49  
50  
51  
52  
53  
54  
55  
56  
57  
58  
59  
60

## BACKGROUND

Indigenous<sup>1</sup> people are overrepresented among homeless populations in every part of the world where these rates are documented (1). Indigenous people struggling with mental illness, substance use or homelessness often share experiences involving structural inequities and trauma related to colonization. Despite a visible presence of Indigenous peoples in the urban homeless populations of North America, Australia and New Zealand, there is limited research investigating the prevalence and causes of Indigenous homelessness (1). Canadian data indicate that homelessness among Indigenous people is 8 times more prevalent than among non-Indigenous people (2). Indigenous Australians comprise 9% of the homeless population compared to less than 2% of the general population. Similarly, in New Zealand, Maori homelessness has been reported to be five times that of non-Maori (1).

Pathways to homelessness include poverty, mental illness, addiction, lack of affordable housing, and socio-economic inequities (3-5). More specifically, a clear link has been established between mental illness and homelessness (6,7). The deinstitutionalization of individuals with serious mental illness, combined with barriers resulting from housing policy and lack of affordable housing, has contributed to high rates of homelessness (8). Further, fragmentation between primary care, substance use and mental health systems has resulted in overall poor health for marginalized people who are struggling to find stable housing (7).

Indigenous pathways to homelessness are likely inclusive of the above factors, but are further shaped by the presence of profound intergenerational trauma, systemic racism, cultural oppression, disempowerment and dispossession of Indigenous lands (2,3,9). Compared to the general population, Indigenous people become homeless at a younger age

---

<sup>1</sup> The term 'Indigenous' will be used throughout this paper to collectively describe the Indigenous peoples of Canada, inclusive of those who identify as 'Aboriginal', or First Nations, Métis and Inuit. This term is used while also acknowledging the diversity of cultures, languages and traditions that exist among Indigenous Canadians.

1  
2  
3 and Indigenous youth are over-represented in the child welfare system (2). These  
4  
5 differences have led to the development of a distinct definition of Indigenous homelessness  
6  
7 in Canada: “Unlike the common colonialist definition of homelessness, Indigenous  
8  
9 homelessness is not defined as lacking a structure of habitation; rather, it is more fully  
10  
11 described and understood through a composite lens of Indigenous worldviews. These  
12  
13 include: individuals, families and communities isolated from their relationships to land,  
14  
15 water, place, family, kin, each other, animals, cultures, languages and identities. Importantly,  
16  
17 Indigenous people experiencing these kinds of homelessness cannot culturally, spiritually,  
18  
19 emotionally or physically reconnect with their Indigeneity or lost relationships”(10). A  
20  
21 related insight can be found in the final report of Canada’s Truth and Reconciliation  
22  
23 Commission, which examined the urgent and complex relationships between Indigenous  
24  
25 and non-Indigenous peoples in Canada and does not mention the term “homelessness” at  
26  
27 all, but includes the term “home” 146 times, usually in the context of loss, and enforced  
28  
29 separation (11).  
30  
31  
32

33           Among relevant empirical studies, disparities have been reported concerning  
34  
35 Indigenous peoples’ access to appropriate and responsive primary health care (12).  
36  
37 However, there are substantial gaps in research examining the implications of historical and  
38  
39 current differences between Indigenous and non-Indigenous peoples as they relate to  
40  
41 policies and services addressing homelessness and mental illness. In a review of the  
42  
43 supportive housing literature, Rog and colleagues called for further research into the effects  
44  
45 of race and ethnicity (13). Indeed, few studies have examined the potential upstream causal  
46  
47 factors that contribute to the overrepresentation of Indigenous people among the homeless  
48  
49 (1). Such information is essential to the development of effective policies.  
50  
51  
52

53           The current study investigated differences between Indigenous and non-Indigenous  
54  
55 people who experienced homelessness and mental illness, and whether differences are  
56  
57 consistent with distinct trajectories leading to homelessness. We hypothesized that  
58  
59  
60

1  
2  
3 Indigenous participants would be more likely to have experienced homelessness earlier in  
4 life and have higher prevalence of trauma and substance use, and that non-Indigenous  
5 participants would be more likely to experience serious mental illness such as  
6  
7 schizophrenia.  
8  
9  
10

## 11 12 13 **METHODS**

### 14 15 **Ethics Statement**

16 This study sample was recruited for the following experimental trials:  
17  
18 ISRCTN42520374; ISRCTN57595077; ISRCTN66721740. All variables were collected pre-  
19 randomization. Ethical review and approval was conducted by the Research Ethics Boards  
20 at Simon Fraser University, The University of British Columbia and the University of  
21  
22 Manitoba with endorsement from the University of Winnipeg.  
23  
24  
25  
26  
27  
28

### 29 30 **Data Source and Sample**

31 The At Home/Chez Soi study took place in five Canadian cities and enrolled  
32 participants who were homeless and mentally ill (14,15). The current study includes  
33 baseline data from Vancouver and Winnipeg, the sites with the highest proportions of  
34  
35 Indigenous people who are homeless. Further details related to the trial protocols and  
36  
37 methods that are not essential to the current study have been published elsewhere(14,15).  
38  
39  
40

41 Eligibility criteria included being a legal adult (19 years or older), current mental  
42  
43 disorder, and being absolutely or precariously housed. Absolute homelessness was defined  
44 as having no place to stay for more than seven nights and little likelihood of finding a place  
45  
46 in the next month (14). Precarious housing referred to living in a rooming house, hotel or  
47  
48 transitional housing, and having at least two episodes of homelessness, as defined above, in  
49  
50 the past year (14,15). Participants were recruited through referral from diverse agencies  
51  
52 including: homeless shelters; drop in centers; homeless outreach teams; hospitals;  
53  
54 community mental health team and criminal justice programs. Organizations that serve  
55  
56  
57  
58  
59  
60



1  
2  
3 women, youth, Indigenous peoples and gay/lesbian/transgender were targeted to obtain a  
4  
5 diverse sample.  
6

7 An initial face-to-face interview was conducted to determine if referred individuals  
8  
9 met the inclusion criteria. Upon meeting criteria, participants were enrolled and  
10  
11 administered the baseline questionnaire that included information on socio-demographics,  
12  
13 mental illness, substance use, physical health, service use and quality of life. Participants  
14  
15 received a cash honorarium of \$30 upon completion of the baseline interview and \$20 for  
16  
17 each subsequent interview. Results are based on data from the baseline questionnaires of  
18  
19 497 Vancouver participants and 513 Winnipeg participants.  
20  
21  
22

## 23 **Patient and Public Involvement**

24  
25 Indigenous people and other community stakeholders were engaged in the  
26  
27 development and implementation of this research. Community meetings (including  
28  
29 advertised open meetings) and six focus groups were conducted with key informants (15).  
30  
31 In total, 58 individuals were convened and met with a facilitator who prepared reports of  
32  
33 the proceedings. Focus group participants advised on procedures, reducing risks and  
34  
35 maximizing benefits to participants and on how to incorporate the expertise of individuals  
36  
37 with direct experience of homelessness into the study. Narrative feedback from participants  
38  
39 was incorporated into the grant application and the project. Service providers were also  
40  
41 consulted extensively during the design of the research. More specifically, in Winnipeg,  
42  
43 where Indigenous homelessness was a specific focus, an Indigenous Research steering  
44  
45 committee was created, comprised of elders and traditional teachers, to provide cultural  
46  
47 advice and guidance to the research team and ensure that Indigenous perspectives were  
48  
49 incorporated. In addition, a Lived Experience Circle (LEC) was created. The LEC specifically  
50  
51 ensured that Indigenous lived experience perspectives were honoured and promoted  
52  
53 through the research. In Winnipeg, patients or persons with lived experience (PWLE) were  
54  
55  
56  
57  
58  
59  
60

1  
2  
3 involved in multiple roles on the project as representatives on an advisory committee and  
4 employed as research staff. PWLE assisted in facilitating integrated knowledge exchange  
5 working with staff of the interventions and directly to bring patient perspectives into the  
6 research and interventions. Since completion of the trial, across all study sites findings have  
7 been reported at a wide array of academic and non-academic research forums and have  
8 been distributed to diverse audiences including provincial governments, municipalities,  
9 health authorities and community agencies. In April 2018, a forum was held where key  
10 members of community service organizations that work with Indigenous people who are  
11 homeless and PWLE were invited to review study results and were invited to provide their  
12 recommendations and guide the interpretation of meaning. The current findings will be  
13 disseminated following publication via the established network of local service providers,  
14 stakeholders and participants of the research forum.

### 30 **Variables of Interest**

31  
32 Indigenous or Aboriginal ethnicity status was derived from self-report. Participants  
33 were asked if they identify as “Aboriginal” and to check all that apply: Inuit, Métis, First  
34 Nations status, First Nations non-status, Indigenous from outside Canada and other. For the  
35 purposes of these analyses participants who identified as any of these categories of  
36 “Aboriginal” were considered to be Indigenous. The cluster of severe mental disorders  
37 includes at least one of current (i.e. past month) Psychotic Disorder, mood disorder with  
38 psychotic features, and hypomanic or manic episode, as identified through the MINI  
39 International Neuropsychiatric Interview (M.I.N.I.)(16). The less severe cluster includes at  
40 least one of current major depressive episode, panic disorder and posttraumatic stress  
41 disorder (PTSD). Substance dependence was assessed using the MINI and the GAIN SPS  
42 (Global Assessment of Individual Need – Substance Problem Scale), a 16 item subscale that  
43 integrates research and clinical assessment for people presenting for substance abuse  
44  
45  
46  
47  
48  
49  
50  
51  
52  
53  
54  
55  
56  
57  
58  
59  
60

1  
2  
3 treatment (14). Frequency of use included all illicit drugs. Infectious disease was based on a  
4 positive self-report diagnosis of HIV, Hepatitis B, or Hepatitis C. Self-reported involvement  
5 with health services was collected for the past 6 months including visiting a: Family doctor,  
6 Psychiatrist, Emergency room (ER) and being transported by ambulance to an ER. Access to  
7 health care was elicited by the questions “Is there a place that you usually go to when you’re  
8 sick or in need of advice about your health?” and “In the past 6 months, was there ever a  
9 time when you needed health care but you did not receive it?” Criminal justice services  
10 included: Contact with the police that did not result in arrest; contacts that resulted in  
11 arrest; or being held in a police cell for less than 24 hours. Participants were categorized as  
12 either moderate needs (MN) or high needs (HN). Inclusion in the HN category was based on  
13 a score of 62 or lower on the Multnomah Community Ability Scale (MCAS) or current  
14 bipolar or psychotic disorder as well as one of the following: legal involvement in the past  
15 year; substance dependence in the past month; and two or more hospitalizations for mental  
16 illness in the past 5 years (17,18). All other eligible participants were categorized as MN in  
17 the study(15).

## 36 **Statistical Analysis**

37  
38 Pearson Chi-square or Fisher’s exact test were used to conduct comparisons  
39 between baseline socio-demographic characteristics for Vancouver and Winnipeg  
40 participants and to make comparisons between Indigenous and non-Indigenous  
41 participants. Comparisons of numeric variables (e.g. age at enrolment) between groups  
42 were conducted using the Student t test and Wilcoxon’s rank-sum test. Comparisons were  
43 conducted across socio-demographic variables, homelessness variables, mental health,  
44 substance use, health conditions and service use for individuals of Indigenous vs. non-  
45 Indigenous ethnicity. Univariate and multivariate logistic regression analyses were used to  
46 model the independent associations between Indigenous ethnicity and a series of outcome  
47  
48  
49  
50  
51  
52  
53  
54  
55  
56  
57  
58  
59  
60

1  
2  
3 variables. Outcome variables that were significant at the  $p < 0.05$  level were considered for  
4 the multivariable logistic regression analyses. The multivariable model adjusted for  
5 potentially confounding variables which may have been unevenly distributed based on  
6 ethnicity (15,19). The following controlling variables were used for the multivariable  
7 model: age (continuous); gender (man, woman); need level (high, moderate); marital status  
8 (single, other); site (Vancouver, Winnipeg); education (completed high school, incomplete  
9 high school); have children (under age 18). Both unadjusted and adjusted odds ratios and  
10 95% Confidence intervals (CI) are reported. SPSS Version 21 was used to conduct these  
11 analyses.  
12  
13  
14  
15  
16  
17  
18  
19  
20  
21

## 22 **RESULTS**

23  
24 Descriptive characteristics of participants recruited in Vancouver (n=497) and  
25 Winnipeg (n=513) are presented in Table 1. In Vancouver, the mean age of participants was  
26 41 years (SD=11) and the majority were male (73%), White (56%), single/never married  
27 (70%), and had not completed high school (57%). In Winnipeg, the mean age of participants  
28 (n=513) was 39 years (SD=11) and the majority were male (64%), Indigenous (71%),  
29 single/never married (70%), and had not completed high school (69%). Participants at the  
30 Vancouver and Winnipeg sites significantly differed with respect to: Need level; gender;  
31 ethnicity; education; hospitalizations; arrests; housing status; mental illness severity; and  
32 suicidality ( $p \leq 0.05$ ).  
33  
34  
35  
36  
37  
38  
39  
40  
41  
42

43  
44 Univariate comparisons between Indigenous (439) and non-Indigenous (571)  
45 samples from both study sites are presented in Table 2. The majority of Indigenous  
46 participants met criteria for the moderate needs condition (59%), were male (61%), had  
47 not completed high school (75%) and had a lifetime duration of homelessness greater than  
48 three years (52%). Compared to non-Indigenous participants, Indigenous participants were  
49 more likely to have children under the age of 18 (52% vs. 25%) and were first homeless at a  
50 younger age (63% vs. 51% reporting being first homeless before the age of 30).  
51  
52  
53  
54  
55  
56  
57  
58  
59  
60

1  
2  
3 Effect size estimates as unadjusted and adjusted odds ratios (UOR and AOR) and  
4  
5 95% confidence intervals (CI) are presented in Table 3. Results from multivariable logistic  
6  
7 regression analyses indicate that self-reported Indigenous ethnicity independently  
8  
9 predicted a younger age first homeless <25 years (AOR: 1.56; 95%CI= 1.06-2.27), a longer  
10  
11 lifetime duration of homelessness (more than 3 years) (AOR: 1.41; 95%CI= 1.01-2.0), Post-  
12  
13 Traumatic Stress Disorder (PTSD) (AOR: 1.91; 95%CI= 1.35-2.70), not meeting criteria for  
14  
15 “severe” mental disorder (AOR: 1.72; 95%CI= 1.16-2.56), more severe substance use in the  
16  
17 past month (AOR: 2.43; 95%CI= 1.67-3.56) and infectious blood borne diseases (AOR: 1.59;  
18  
19 95%CI= 1.08-2.34).  
20  
21

## 22 **DISCUSSION**

23  
24 Our findings suggest that the trajectories leading to homelessness among  
25  
26 Indigenous and non-Indigenous people differ meaningfully from each other, and that they  
27  
28 can both be understood as consequences of different government policies. Consistent with  
29  
30 the legacy of colonization and cultural genocide, when compared to others, Indigenous  
31  
32 participants experienced homelessness and first used substances at a younger age, spent  
33  
34 more of their lives living homeless, were more frequently taken by ambulance to hospital,  
35  
36 and were more likely to meet criteria for PTSD, severe substance use, and have an infectious  
37  
38 disease. Conversely, non-Indigenous participants were more likely to meet criteria for  
39  
40 schizophrenia or other severe mental illness, suggesting links to deinstitutionalization and  
41  
42 the inadequate implementation of alternative community-based treatment. These  
43  
44 differences require consideration in the development of culturally-appropriate housing and  
45  
46 support services that are specific to the needs of Indigenous and non-Indigenous peoples.  
47  
48 Programs for Indigenous people must prevent homelessness early in life, stemming the  
49  
50 grossly disproportionate rates of removal of Indigenous children and youth into state  
51  
52 administered foster care (20,21).  
53  
54  
55  
56  
57  
58  
59  
60

1  
2  
3           Within our sample of Indigenous people, we found that almost half of the  
4  
5 participants met criteria for PTSD (49% compared to 26% among non-Indigenous),  
6  
7 consistent with a significant body of literature documenting the historical and continuing  
8  
9 trauma experienced by Indigenous people in Canada (22-24). Bombay and colleagues  
10  
11 (2009), proposed that trauma can be transmitted across generations, based on findings that  
12  
13 children of trauma survivors were more likely to have negative responses to stressors and  
14  
15 more likely to develop PTSD or depression as a result (22,23). The overrepresentation of  
16  
17 Indigenous children in the child welfare system and foster care continues to impact  
18  
19 Indigenous families and contributes to homelessness (2,12). In Canada, Indigenous children  
20  
21 and youth are 15 times more likely to be in government care than non-Indigenous children  
22  
23 and youth (20). Cycles of child neglect have been attributed to the impact of  
24  
25 intergenerational trauma exhibited in Indigenous communities in varying degrees resulting  
26  
27 from the residual effects of experiences in residential schools, the 60's scoop and the child  
28  
29 welfare system (20). Intergenerational trauma represents a complex subtype of PTSD that  
30  
31 must be addressed in housing interventions for Indigenous people.  
32  
33  
34

35           Indigenous homeless participants in our study were significantly more likely to have  
36  
37 used drugs at a younger age (13 years) compared to non-Indigenous participants.  
38  
39 Indigenous participants were also more likely to report severe substance use in the past  
40  
41 month. These findings are consistent with research involving non-homeless samples and  
42  
43 showing that Indigenous youth compared to non-Indigenous youth have a higher likelihood  
44  
45 of experimenting with substances at a younger age and using substances persistently into  
46  
47 adulthood (25,26). Early initiation into drug use poses a significant risk for adverse  
48  
49 outcomes such as infectious disease and other morbidity or mortality. Youth who initiated  
50  
51 injection drug use at an earlier age have been found to be more likely to become infected  
52  
53 with HIV and Hepatitis C, demonstrating the need for targeted and early intervention for  
54  
55 youth at risk of drug use (27). Observers have consistently reported that Indigenous youth  
56  
57  
58  
59  
60

1  
2  
3 are at disproportionately high risk for problematic substance use. However, few studies  
4  
5 have investigated the protective factors related to substance use trajectories for Indigenous  
6  
7 youth (28). Mainstream substance use treatment models have demonstrated limited  
8  
9 success for Indigenous people (29). This may be because the factors responsible for  
10  
11 substance use, (as well as homelessness and trauma) are unique to the experience of  
12  
13 Indigenous people, and require “treatments” that restore and rebuild Indigenous culture  
14  
15 and rights. Approaches that create reconnection to community, culture and traditions have  
16  
17 been shown to have a positive impact on substance use (29). Rawana & Ames reported that  
18  
19 optimism, participation in recreational activities, and attendance at religious or spiritual  
20  
21 services were found to be protective against alcohol misuse for Indigenous youth (28).  
22  
23 Prevention and early intervention of problematic substance use among Indigenous youth is  
24  
25 urgently required in on-reserve and urban settings. Culturally relevant curricula, increased  
26  
27 access to psychosocial supports, youth sports and recreation and peer support models and  
28  
29 trauma informed services are also required.  
30  
31  
32

33  
34 Indigenous homelessness is an urgent concern and perpetuates inter-generational  
35  
36 suffering of individuals as well as their families and communities. In 2018, the Metro  
37  
38 Vancouver homeless count reported that Indigenous people comprised 40% of the  
39  
40 homeless but only 2.2% of the total population, with close to half of Indigenous homeless  
41  
42 identified as unsheltered (46%) (30). Furthermore, Indigenous women accounted for 53%  
43  
44 of the Indigenous homeless in Vancouver. Among youth who were under 25 years close to  
45  
46 half (46%) identified as Indigenous (30). In the 2016 count, homelessness among youth had  
47  
48 increased to the highest level recorded in the region with 397, or 24% of the overall  
49  
50 homeless population, under the age of 25. Youth reported that they had been affected by the  
51  
52 lack of youth services or cuts to youth programs from one or more levels of government  
53  
54 (31). Street involved youth often fall between services tailored to children or adults, and  
55  
56 this issue is further complicated for Indigenous youth in the child welfare system (19,32).  
57  
58  
59

1  
2  
3 Developmental resources grounded in Indigenous cultural practices are required to prevent  
4 homelessness among youth who are transitioning from foster care settings and also to  
5 support youth who experienced trauma in foster care settings (19,32).  
6  
7  
8

9  
10 Indigenous participants in both sites were significantly more likely than non-  
11 Indigenous people to have a regular medical doctor and were also more likely to have been  
12 taken to the hospital by an ambulance in the past 6 months. This seemingly contradictory  
13 finding may indicate that medical care alone is insufficient to prevent acute emergencies  
14 caused by environmental, social, and historical harms. Moreover, emergency room visits  
15 may be for reasons other than those typically addressed in a primary care setting such as  
16 acute psychotic symptoms, overdose, acute trauma, and other serious health complications  
17 caused by long-term homelessness.  
18  
19  
20  
21  
22  
23  
24  
25

26  
27 The use of ambulance services for those who are homeless and mentally ill is  
28 indicative of the lack of essential supports to sustain wellness. Consistent with research  
29 with non-homeless samples, we found that Indigenous participants were more likely than  
30 non-Indigenous people to report positive status for HIV, Hepatitis C or Hepatitis B  
31 Virus(33,34). Marshall and colleagues examined HIV prevalence among street-involved  
32 youth and found that Indigenous ethnicity was a correlate of HIV infection and that  
33 Hepatitis C co-infection was less common among Indigenous participants (33). Indigenous  
34 people also face disparities in HIV outcomes and treatment, as they are likely to be  
35 diagnosed and initiate treatment later than non-Indigenous patients. Indigenous people  
36 have been noted to suffer higher mortality even after receiving antiretroviral treatment,  
37 suggesting that social determinants may need to be addressed in order to realize the  
38 expected effectiveness of medical treatment (34). Interventions must consider the inter-  
39 generational context of Indigenous homelessness, and promote the health of children  
40 through investments in families and communities.  
41  
42  
43  
44  
45  
46  
47  
48  
49  
50  
51  
52  
53  
54  
55  
56  
57  
58  
59  
60



1  
2  
3 This analysis has strengths and limitations. Strengths of the study include a large  
4 sample size, structured diagnostic interviews, and self-report measures validated against  
5 administrative data sources (35). Limitations include the possibility that current mental  
6 illness or substance use symptoms may have compromised some participant responses.  
7  
8 Although participants were asked if they were First Nations, Inuit, Métis and status vs. non-  
9 status the current study did not allow for analysis to elicit unique differences between these  
10 smaller groups. It is recommended that further research investigate the differences  
11 between First Nations, Métis and Inuit service needs as well as differences between those  
12 recognized as status and non-status under the Indian Act to elucidate the diversity of  
13 service needs within Indigenous groups. Finally, we relied on self-reported ethnicity and it  
14 is possible that Indigenous people may not have self-identified due to concerns related to  
15 stigma and discrimination.  
16  
17  
18  
19  
20  
21  
22  
23  
24  
25  
26  
27  
28

## 29 **Implications**

30 Pathways leading to homelessness differ meaningfully between Indigenous and  
31 non-Indigenous adults who meet criteria for current homelessness and mental illness.  
32 Consistent with our hypotheses, Indigenous participants experienced homelessness at a  
33 younger age, were homeless longer, had greater substance-related problems, less formal  
34 education, more health emergencies, and higher rates of infectious disease than non-  
35 Indigenous participants. Indigenous participants were also significantly more likely to  
36 satisfy our study's "mental illness" criterion with PTSD, while non-Indigenous participants  
37 were more likely to meet criteria for Schizophrenia or Bipolar Disorder. Our findings are  
38 consistent with the view that solutions to Indigenous homelessness – both prevention and  
39 treatment – must involve practices that restore social and cultural power to Indigenous  
40 communities. By contrast, non-Indigenous participants showed strong indications for the  
41 appropriateness of housing and assertive community treatment, as promised by  
42 governments during the era of deinstitutionalization. Further research is needed to  
43  
44  
45  
46  
47  
48  
49  
50  
51  
52  
53  
54  
55  
56  
57  
58  
59  
60

1  
2  
3 replicate these findings in other regions and where the historical experiences of Indigenous  
4  
5 peoples differ based on varying degrees of political and social autonomy and the  
6  
7 preservation of cultural practices.  
8  
9  
10  
11  
12  
13  
14  
15  
16  
17  
18  
19  
20  
21  
22  
23  
24  
25  
26  
27  
28  
29  
30  
31  
32  
33  
34  
35  
36  
37  
38  
39  
40  
41  
42  
43  
44  
45  
46  
47  
48  
49  
50  
51  
52  
53  
54  
55  
56  
57  
58  
59  
60

**Table 1: Socio-demographic, mental health, substance use and service use characteristics for Vancouver and Winnipeg at Home Study Participants (N=1010)**

| Variable                                                                           | Vancouver Site<br>N (%)<br><b>497(49.2)</b> | Winnipeg Site<br>N (%)<br><b>513(50.8)</b> | P-Value         |
|------------------------------------------------------------------------------------|---------------------------------------------|--------------------------------------------|-----------------|
| <b>Need Level</b>                                                                  |                                             |                                            |                 |
| High Need                                                                          | 297(59.8)                                   | 199(38.8)                                  | <b>&lt;.001</b> |
| Moderate Need                                                                      | 200(40.2)                                   | 314(61.2)                                  |                 |
| <b>Gender</b>                                                                      |                                             |                                            |                 |
| Male                                                                               | 359(72.8)                                   | 326(63.8)                                  | <b>.002</b>     |
| Female                                                                             | 134(27.2)                                   | 185(36.2)                                  |                 |
| <b>Age at Enrollment</b>                                                           |                                             |                                            |                 |
| Youth                                                                              | 36(7.2)                                     | 64(12.5)                                   |                 |
| 25-44 Years                                                                        | 281(56.5)                                   | 277(54.0)                                  |                 |
| 44 Plus Years                                                                      | 180(36.2)                                   | 172(33.5)                                  |                 |
| <b>Ethnicity</b>                                                                   |                                             |                                            |                 |
| Indigenous                                                                         | 77(15.5)                                    | 362(70.6)                                  | <b>&lt;.001</b> |
| Caucasian                                                                          | 280(56.3)                                   | 112(21.8)                                  |                 |
| Mixed/Other                                                                        | 140(28.2)                                   | 39(7.6)                                    |                 |
| <b>Education</b>                                                                   |                                             |                                            |                 |
| High School or Higher                                                              | 214(43.3)                                   | 157(30.7)                                  | <b>&lt;.001</b> |
| Less than High School                                                              | 280(56.7)                                   | 354(69.3)                                  |                 |
| <b>Marital Status</b>                                                              |                                             |                                            |                 |
| Single (never married)                                                             | 343(69.6)                                   | 359(70.3)                                  | .971            |
| Married/Partner                                                                    | 25(5.1)                                     | 25(4.9)                                    |                 |
| Separated/Widow/divorced                                                           | 125(25.4)                                   | 127(24.9)                                  |                 |
| <b>Have Children (under 18)</b>                                                    | 122(25.1)                                   | 238(47.1)                                  | <b>&lt;.001</b> |
| <b>Hospitalized for mental illness over 6 months in past 5 years</b>               | 57(11.7)                                    | 23(4.5)                                    | <b>&lt;.001</b> |
| <b>Hospitalized for mental illness over 2 times in the past 5 years</b>            | 253(52.7)                                   | 111(21.9)                                  | <b>&lt;.001</b> |
| <b>Arrested/Imprisoned/Probation/Community sanction in past 6 months</b>           | 221(45.2)                                   | 179(35.0)                                  | <b>.001</b>     |
| <b>Spend 1 or more night in hospital, detox, shelter and jail in past 6 months</b> | 65(84.4)                                    | 321(88.7)                                  | .298            |
| <b>Length of Homelessness Lifetime</b>                                             |                                             |                                            |                 |
| 1-3 years                                                                          | 257(52.3)                                   | 262(53.0)                                  | .827            |
| 3 years plus                                                                       | 234(47.7)                                   | 232(47.0)                                  |                 |
| <b>Length of homelessness longest single period</b>                                |                                             |                                            |                 |
| 12 months                                                                          | 246(50.1)                                   | 227(46.9)                                  | .317            |
| 13-60 months                                                                       | 182(37.1)                                   | 192(39.7)                                  |                 |
| 60 months plus                                                                     | 63(12.8)                                    | 65(13.4)                                   |                 |
| <b>Age first homeless</b>                                                          |                                             |                                            |                 |
| 18 years or less                                                                   | 110(22.4)                                   | 138(27.2)                                  | .173            |
| 19-30 years                                                                        | 158(32.2)                                   | 151(29.8)                                  |                 |

|                                                                          |           |           |                 |
|--------------------------------------------------------------------------|-----------|-----------|-----------------|
| 31-40 years                                                              | 94(19.1)  | 106(20.9) |                 |
| Over 40 years                                                            | 129(26.3) | 112(22.1) |                 |
| <b>Housing Status</b>                                                    |           |           |                 |
| Absolutely Homeless                                                      | 388(78.1) | 354(69.1) | <b>.001</b>     |
| Precariously Housed                                                      | 109(21.9) | 158(30.9) |                 |
| Less severe mental illness                                               | 264(53.1) | 436(85.0) | <b>&lt;.001</b> |
| Multiple mental disorders ( $\geq 2$ )                                   | 240(48.3) | 338(65.9) | <b>&lt;.001</b> |
| PTSD                                                                     | 129(26.0) | 233(45.4) | <b>&lt;.001</b> |
| Current suicidality (high)                                               | 373(75.1) | 447(87.1) | <b>&lt;.001</b> |
| Blood borne diseases                                                     | 157(31.9) | 113(22.2) | <b>.001</b>     |
| Two or more physical illness                                             | 402(80.9) | 458(89.3) | <b>&lt;.001</b> |
| Have a regular medical doctor                                            | 320(64.5) | 337(65.7) | .695            |
| Place you usually go when you are sick or need advice about your health  | 395(80.8) | 430(84.1) | .161            |
| Needed health care, but did not receive it in past 6 months              | 209(43.2) | 278(55.0) | <b>&lt;.001</b> |
| Alcohol dependence                                                       | 29(37.7)  | 261(72.1) | <b>&lt;.001</b> |
| Current Substance dependence                                             | 57(74.0)  | 183(50.6) | <b>&lt;.001</b> |
| Age first alcohol use (categorized by median) ( $\geq 14$ ; $\leq 13$ )  | 33(44.0)  | 140(39.9) | <b>.510</b>     |
|                                                                          | 42(56.0)  | 211(60.1) |                 |
| Age first drug use (After $\geq 14$ ; $\leq 13$ )                        | 37(49.3)  | 160(47.1) | <b>.721</b>     |
|                                                                          | 38(50.7)  | 180(52.9) |                 |
| GAIN Score – (0-3 less severe); (4-5 severe) substance use in past month | 34(48.6)  | 214(62.8) | <b>.027</b>     |
|                                                                          | 36(51.4)  | 127(37.2) |                 |

**Table 2: Socio-demographic, mental health, substance use and service use characteristics for Vancouver and Winnipeg at Home Study participants by Indigenous ethnicity (N=1010)**

| Variable                                                                              | Indigenous<br>N (%)<br>439(43.5%) | Non-Indigenous<br>N (%)<br>571(56.5%) | P-Value         |
|---------------------------------------------------------------------------------------|-----------------------------------|---------------------------------------|-----------------|
| <b>Need Level</b>                                                                     |                                   |                                       |                 |
| High Need                                                                             | 180(41.0)                         | 316(55.3)                             | <b>&lt;.001</b> |
| Moderate Need                                                                         | 259(59.0)                         | 255(44.7)                             |                 |
| <b>Gender</b>                                                                         |                                   |                                       |                 |
| Male                                                                                  | 265(61.1)                         | 420(73.7)                             | <b>&lt;.001</b> |
| Female                                                                                | 169(38.9)                         | 150(26.3)                             |                 |
| <b>Age at Enrollment</b>                                                              |                                   |                                       |                 |
| Youth                                                                                 | 53(12.1)                          | 47(8.2)                               | <b>.043</b>     |
| 25-44 Years                                                                           | 266(60.6)                         | 292(51.1)                             |                 |
| 44 Plus Years                                                                         | 120(27.3)                         | 232(40.6)                             |                 |
| <b>Education</b>                                                                      |                                   |                                       |                 |
| High School or Higher                                                                 | 110(25.2)                         | 261(46.0)                             | <b>&lt;.001</b> |
| Less than High School                                                                 | 327(74.8)                         | 307(54.0)                             |                 |
| <b>Marital Status</b>                                                                 |                                   |                                       |                 |
| Single (never married)                                                                | 313(71.6)                         | 389(68.6)                             | <b>.018</b>     |
| Married/Partner                                                                       | 29(6.6)                           | 21(3.7)                               |                 |
| Separated/Widow/divorced                                                              | 95(21.7)                          | 157(27.7)                             |                 |
| <b>Have Children (under 18)</b>                                                       | 222(51.5)                         | 138(24.6)                             | <b>&lt;.001</b> |
| <b>Hospitalized for mental illness over 6 months in past 5 years</b>                  | 22(5.1)                           | 58(10.3)                              | <b>.003</b>     |
| <b>Hospitalized for mental illness over 2 times in the past 5 years</b>               | 107(24.7)                         | 257(46.5)                             | <b>&lt;.001</b> |
| <b>Arrested/Imprisoned/Probation/<br/>community sanction in past 6 months</b>         | 171(39.0)                         | 229(40.7)                             | .585            |
| <b>Spent one or more nights in hospital, detox, shelter and jail in past 6 months</b> | 386(87.9)                         | 510(89.6)                             | .393            |
| <b>Length of Homelessness Lifetime</b>                                                |                                   |                                       |                 |
| 1-3 years                                                                             | 205(48.3)                         | 314(56.0)                             | <b>.018</b>     |
| 3 years plus                                                                          | 219(51.7)                         | 247(44.0)                             |                 |
| <b>Length of homelessness longest single period</b>                                   |                                   |                                       |                 |
| 12 months                                                                             | 189(45.2)                         | 284(51.0)                             | <b>.074</b>     |
| 13-60 months                                                                          | 166(39.7)                         | 208(37.3)                             |                 |
| 60 months plus                                                                        | 63(15.1)                          | 65(11.7)                              |                 |
| <b>Age first homeless</b>                                                             |                                   |                                       |                 |
| 18 years or less                                                                      | 130(30.0)                         | 118(20.9)                             | <b>&lt;.001</b> |
| 19-30 years                                                                           | 142(32.7)                         | 167(29.6)                             |                 |
| 31-40 years                                                                           | 86(19.8)                          | 114(20.2)                             |                 |
| Over 40 years                                                                         | 76(17.5)                          | 165(29.3)                             |                 |
| <b>Housing Status</b>                                                                 |                                   |                                       |                 |
| Absolutely Homeless                                                                   | 309(70.4)                         | 433(76.0)                             | <b>.046</b>     |
| Precariously Housed                                                                   | 130(29.6)                         | 137(24.0)                             |                 |
| Less severe mental illness                                                            | 370(84.3)                         | 330(57.8)                             | <b>&lt;.001</b> |

|                                                                          |           |           |                 |
|--------------------------------------------------------------------------|-----------|-----------|-----------------|
| Multiple mental disorders ( $\geq 2$ )                                   | 290(66.1) | 288(50.4) | <b>&lt;.001</b> |
| PTSD                                                                     | 215(49.0) | 147(25.8) | <b>&lt;.001</b> |
| Current suicidality (high)                                               | 381(86.8) | 439(76.9) | <b>&lt;.001</b> |
| Blood borne diseases                                                     | 122(28.1) | 148(26.1) | .488            |
| Two or more physical illness                                             | 389(88.6) | 471(82.5) | <b>.007</b>     |
| Have a regular medical doctor                                            | 299(68.1) | 358(62.8) | .080            |
| Place you usually go when you are sick or need advice about your health  | 373(85.4) | 452(80.3) | <b>.036</b>     |
| Needed health care, but did not receive it in past 6 months              | 224(51.7) | 263(47.3) | .167            |
| Alcohol dependence                                                       | 290(66.1) | 153(26.8) | <b>&lt;.001</b> |
| Current Substance dependence                                             | 240(54.7) | 289(50.6) | .201            |
| Age first alcohol use (categorized by median) ( $\geq 14$ ; $\leq 13$ )  | 173(40.6) | 301(55.4) | <b>&lt;.001</b> |
|                                                                          | 253(59.4) | 242(44.6) |                 |
| Age first drug use (After $\geq 14$ ; $\leq 13$ )                        | 197(47.5) | 327(63.1) | <b>&lt;.001</b> |
|                                                                          | 218(52.5) | 191(36.9) |                 |
| GAIN Score – (0-3 less severe); (4-5 severe) substance use in past month | 248(60.3) | 405(75.4) | <b>&lt;.001</b> |
|                                                                          | 163(39.7) | 132(24.6) |                 |

**Table 3: Logistic Regression analysis to estimate the association between Indigenous Ethnicity and homelessness, mental & physical illness and service utilization among Vancouver and Winnipeg 'At home' participants (N=1010)**

| Dependent variable                                                       | Unadjusted OR (95% CI) | P Value | Adjusted <sup>2</sup> OR (95% CI) | P Value |
|--------------------------------------------------------------------------|------------------------|---------|-----------------------------------|---------|
| <b>Homelessness</b>                                                      |                        |         |                                   |         |
| Age first homeless (<25 years)                                           | 1.54 (1.19, 1.98)      | .001*   | 1.56 (1.06, 2.27)                 | .023*   |
| Lifetime duration of homelessness (More or less than 3 years)            | 1.36(1.05, 1.75)       | .018*   | 1.41(1.01, 2.0)                   | .041*   |
| Longest single episode of homelessness (1 year or more)                  | 1.26(0.98, 1.63)       | .074    | 1.10(0.79, 1.52)                  | .590    |
| <b>Mental Health</b>                                                     |                        |         |                                   |         |
| PTSD                                                                     | 2.76(2.12, 3.60)       | <.001*  | 1.91(1.35, 2.70)                  | <.001*  |
| Multiple mental disorders (≥2)                                           | 1.91(1.48, 2.47)       | <.001*  | 1.27(0.90, 1.78)                  | .169    |
| Less severe mental disorder                                              | 3.92(2.89, 5.32)       | <.001*  | 1.72(1.16, 2.56)                  | .008*   |
| Severe mental disorder                                                   | 0.46(0.35, 0.59)       | <.001*  | 0.73(0.50, 1.07)                  | .104    |
| <b>Substance Use</b>                                                     |                        |         |                                   |         |
| Current substance dependence                                             | 1.18(0.92, 1.51)       | .201    | 1.31(0.92, 1.86)                  | .132    |
| Age first alcohol use (After ≥ 14; ≤13)                                  | 1.82(1.41, 2.35)       | <.001*  | 1.35(0.97, 1.87)                  | .077    |
| Age first drug use (After ≥ 14; ≤13)                                     | 1.90(1.46, 2.46)       | <.001*  | 1.68(1.20, 2.37)                  | .003*   |
| GAIN Score – (0-3 less severe); (4-5 severe) substance use in past month | 2.02(1.53, 2.67)       | <.001*  | 2.43(1.67, 3.56)                  | <.001*  |
| <b>Chronic Diseases</b>                                                  |                        |         |                                   |         |
| Infectious (Blood Borne) disease – HIV, HEP C, HBV                       | 1.10(0.83, 1.46)       | .489    | 1.59(1.08, 2.34)                  | .018*   |
| Multiple comorbid conditions (2 or more)                                 | 1.65(1.15, 2.40)       | .007*   | 1.02(0.64, 1.64)                  | .923    |
| Three or more physical conditions                                        | 1.90(1.41, 2.60)       | <.001*  | 1.28(0.87, 1.90)                  | .212    |
| <b>Service Use</b>                                                       |                        |         |                                   |         |
| Have regular medical doctor                                              | 1.27(0.97, 1.65)       | .080    | 1.49(1.05, 2.10)                  | .024*   |
| Needed health care but didn't receive it in past 6 months                | 1.19(0.93, 1.54)       | .167    | 0.79(0.57, 1.10)                  | .166    |
| Taken to ER in P6M                                                       | 1.21(0.94, 1.56)       | .145    | 1.37(0.99, 1.92)                  | .062    |
| Multiple ER visit (>1 visit)                                             | 0.89(0.68, 1.16)       | .382    | 1.07(0.75, 1.51)                  | .719    |
| Taken by ambulance to hospital P6M                                       | 1.29(1.0, 1.67)        | .052    | 1.86(1.32, 2.61)                  | <.001*  |
| Arrested P6M                                                             | 0.89(0.68, 1.17)       | .416    | 1.10(0.76, 1.60)                  | .604    |
| Court Appearances P6M                                                    | 0.95(0.73, 1.25)       | .717    | 1.06(0.74, 1.52)                  | .761    |
| Participated in justice service programs (eg. drug                       | 1.30(0.86, 1.96)       | .218    | 1.13(0.66, 1.94)                  | .652    |

<sup>2</sup> - Controlled for age (continuous), gender (male, female), need level (high, moderate), marital status (single, other), site (Vancouver, Winnipeg), education (high school or higher, less than high school) and have children (under 18).

1  
2  
3  
4  
5  
6  
7  
8  
9  
10  
11  
12  
13  
14  
15  
16  
17  
18  
19  
20  
21  
22  
23  
24  
25  
26  
27  
28  
29  
30  
31  
32  
33  
34  
35  
36  
37  
38  
39  
40  
41  
42  
43  
44  
45  
46  
47  
48  
49  
50  
51  
52  
53  
54  
55  
56  
57  
58  
59  
60

|                                                           |  |  |  |  |
|-----------------------------------------------------------|--|--|--|--|
| treatment court, mental health court, Indigenous justice) |  |  |  |  |
|-----------------------------------------------------------|--|--|--|--|

\* $p \leq 0.05$

\*Controlled for age (continuous), gender (male, female), need level (high, moderate), marital status (single, other), site (Vancouver, Winnipeg), education (high school or higher, less than high school), have children (under 18).

For peer review only



**Contributorship Statement:**

BB is the lead in the development of the manuscript. AM carried out the primary statistical analyses. MP, JD, JS and JO contributed to the editing of the manuscript. JS was the principal investigator, contributed to the research design and writing of the manuscript. All authors read and approved the final manuscript.

**Competing Interests:**

The authors declare that they have no competing interests.

**Funding:**

This work was supported by a grant to Simon Fraser University from Health Canada and the Mental Health Commission of Canada. The views expressed herein solely represent the authors.

**Patient Consent:** Obtained.

**Ethics Approval:** Office of Research Ethics, Simon Fraser University and the Health Research Ethics Board at the University of Manitoba.

**Acknowledgments:**

The research team would like to extend thanks to the participants, service providers and field research teams. The authors also thank the At Home/Chez Soi Project Collaborative.

**Data Sharing:**

Data is stored at St. Michael's Hospital in Toronto and is available to external investigators who sign a Data Sharing and Use Agreement that stipulates the responsibilities associated with transfer of datasets. Dr. Carol Adair at the University of Calgary is the data access coordinator.

## References

1. Anderson JT, Collins D. Prevalence and Causes of Urban Homelessness Among Indigenous Peoples: A Three-Country Scoping Review. *Housing Studies* [Internet]. Routledge; 2014 Nov 10;29(7):959–76. Available from: <http://www.tandfonline.com/doi/abs/10.1080/02673037.2014.923091>
2. Patrick C. *Aboriginal Homelessness in Canada: A Literature Review*. Toronto, ON: Canadian Homelessness Research Network Press; 2014 Mar pp. 1–80.
3. Bird C, Goulet S, Oelke ND, Thurston W, Turner D, Woodland A. *Aboriginal Homelessness Research Project: Report on the Aboriginal Homelessness Community Gathering, March 19, 2010*. Calgary, AB: Aboriginal Friendship Centre of Calgary; 2010 Jul pp. 1–34.
4. Perissini T. Pathways into Homelessness: Testing the Heterogeneity Hypothesis. In: Hulchanski DJ, Campsie P, Chau S, Hwang SW, Paradis E, editors. *Finding Home Policy Options for Addressing Homelessness in Canada*. Toronto, ON; 2009. pp. 1–17.
5. Somers JM, Moniruzzaman A, Rezansoff SN. Migration to the Downtown Eastside neighbourhood of Vancouver and changes in service use in a cohort of mentally ill homeless adults: a 10-year retrospective study. *BMJ Open*. British Medical Journal Publishing Group; 2016 Jan 6;6(1):e009043–9.
6. Evans GW, Wells NM, Moch A. Housing and Mental Health: A Review of the Evidence and a Methodological and Conceptual Critique. *Journal of Social Issues*. 2003 May 19;59(3):475–500.
7. Forchuk C, Joplin L, Schofield R, Csiernik R, Gorlick C, Turner K. Housing, income support and mental health: Points of disconnection. *Health Res Policy Sys*. 2007;5(1):14–7.
8. Nelson G. Housing for People with Serious Mental Illness: Approaches, Evidence, and Transformative Change. *Journal of Sociology Social Welfare*. 2010 Dec 28;XXXVII(4):1–25.
9. Turner D, Goulet S, Oelke ND, Thurston W, Woodland A, Bird C, et al. *Aboriginal Homelessness: Looking for a place to belong*. Calgary, AB: Aboriginal Friendship Centre of Calgary; 2010 Mar pp. 1–31.
10. Thistle J. *Indigenous Definition of Homelessness in Canada*. Toronto, Ontario: Canadian Observatory on Homelessness Press; 2017.
11. Truth and Reconciliation Commission of Canada. *What We Have Learned: Principles of Truth and Reconciliation* [Internet]. Winnipeg, MB; 2015 Jun pp. 1–200. Available from: [www.trc.ca](http://www.trc.ca)
12. Browne AJ. *Urban First Nations Health - Research Discussion Paper - May 21*. 2009 May 21;:1–62.
13. Rog DJ, Marshall T, Dougherty RH, George P, Daniels AS, Shoma Ghose S, et al. Permanent Supportive Housing: Assessing the Evidence. *Psychiatric Services*. 2014 Feb 10;65(3):287–94.
14. Goering PN, Streiner DL, Adair CE, Aubry T, Barker J, Distasio J, et al. The At Home/Chez Soi trial protocol: a pragmatic, multi-site, randomised controlled trial of a Housing First intervention for homeless individuals with mental illness in five Canadian cities. *BMJ Open*

- [Internet]. 2011 Nov 14;1(2):e000323-3. Available from: <http://bmjopen.bmj.com/cgi/doi/10.1136/bmjopen-2011-000323>
15. Somers JM, Patterson ML, Moniruzzaman A, Currie LB, Rezansoff SN, Palepu A, et al. Vancouver At Home: pragmatic randomized trials investigating Housing First for homeless and mentally ill adults. *Trials*. 2013 Nov 1;14(1):1-20.
  16. Sheehan D, Lecrubier Y, Sheehan KH, Amorim P, Janavs J, Weiller E, et al. The Mini-International Neuropsychiatric Interview (M.I.N.I.): The Development and Validation of a Structured Diagnostic Psychiatric Interview for DSM-IV and ICD-10. *Journal of Clinical Psychiatry*. 1998;59(Supplement 20):22-3.
  17. Barker S, Barron N, McFarland BH, Bigelow DA. A Community Ability Scale for Chronically Mentally Ill Consumers: Part I. Reliability and Validity. 1994 May 25;30(4):363-83.
  18. Barker S, Barron N, McFarland BH, Bigelow DA, Carnahan T. A Community Ability Scale for Chronically Mentally Ill Consumers: Part II. Applications. *Community Mental Health Journal*. 1994 May 25;30(5):459-72.
  19. Roos LE, Distasio J, Bolton S-L, Katz LY, Afifi TO, Isaak C, et al. A history in-care predicts unique characteristics in a homeless population with mental illness. *Child Abuse & Neglect*. Elsevier Ltd; 2014 Oct 1;38(10):1618-27.
  20. John E. Indigenous Resilience, Connectedness and Reunification - From Root Causes to Root Solutions. Victoria, BC; 2016 Nov 18;:1-220. Available from: <http://fns.bc.ca/wp-content/uploads/2017/01/Final-Report-of-Grand-Chief-Ed-John-re-Indig-Child-Welfare-in-BC-November-2016.pdf>
  21. Patterson ML. History of foster care among homeless adults with mental illness in Vancouver, British Columbia: a precursor to trajectories of risk. *BMC Psychiatry*. 2015 Feb 28;15(1):1-11.
  22. Aguiar W, Halseth R. Aboriginal peoples and historic trauma: The process of intergenerational transmission [Internet]. National Collaborating Centre for Aboriginal Health; 2015 Apr pp. 1-32. Available from: [www.nccah.ca](http://www.nccah.ca)
  23. Bombay A, Matheson K, Anisman H. Intergenerational Trauma: Convergence of Multiple Processes among First Nations Peoples in Canada. *Journal of Aboriginal Health*. 2009 Aug 16;(November):1-42.
  24. Wesley-Esquimaux CC, Smolewski M. *Historic Trauma and Aboriginal Healing*. Ottawa, ON: Aboriginal Healing Foundation; 2004 Jan pp. 1-121.
  25. Canadian Centre on Substance Abuse. *Substance Abuse in Canada: Youth in Focus*. Ottawa, ON; 2007 Aug 8;:1-51.
  26. Kelly M. *Prevention of the Harmful Effects of Substance Use Among Aboriginal Peoples: An Initial Review of the Research Literature*. Victoria, BC: Centre for Addictions Research of BC; 2007 Sep pp. 1-24.
  27. Miller CL, Strathdee SA, Kerr T, Li K, Wood E. Factors associated with early adolescent initiation into injection drug use: implications for intervention programs. 2006 Apr;38(4):462-4.

- 1  
2  
3  
4  
5  
6  
7  
8  
9  
10  
11  
12  
13  
14  
15  
16  
17  
18  
19  
20  
21  
22  
23  
24  
25  
26  
27  
28  
29  
30  
31  
32  
33  
34  
35  
36  
37  
38  
39  
40  
41  
42  
43  
44  
45  
46  
47  
48  
49  
50  
51  
52  
53  
54  
55  
56  
57  
58  
59  
60
28. Rawana JS, Ames ME. Protective Predictors of Alcohol Use Trajectories Among Canadian Aboriginal Youth. *J Youth Adolescence*. 2011 Oct 4;41(2):229–43.
  29. McCormick RM. Aboriginal Traditions in the Treatment of Substance Abuse. *Canadian Journal of Counselling*. 2000 Sep 21;34(1):25–32.
  30. City of Vancouver. 2018 Homeless Count [Internet]. Vancouver, BC; 2018 May. Available from: <http://vancouver.ca/people-programs/homeless-count.aspx>
  31. Thomson M. Vancouver Homeless Count 2016 [Internet]. Vancouver, BC; 2016 May pp. 1–54. Available from: <http://vancouver.ca/files/cov/homeless-count-2016-report.pdf>
  32. Fowler PJ, Toro PA, Miles BW. Pathways to and from homelessness and associate psychosocial outcomes among adolescents leaving the foster care system. 2009 Dec 29;99(8):1453–8.
  33. Marshall BDL, Kerr T, Livingstone C, Li K, Montaner JS, Wood E. High prevalence of HIV infection among homeless and street-involved Aboriginal youth in a Canadian setting. *Harm Reduct J*. 2008;5(1):35–5.
  34. Monette LE, Rourke SB, Gibson K, Bekele TM, Tucker R, Greene S, et al. Inequalities in Determinants of Health Among Aboriginal and Caucasian Persons Living With HIV/AIDS in Ontario: Results From the Positive Spaces, Healthy Places Study. *Canadian Journal of Public Health*. 2011 Jul 27;102(3):216–9.
  35. Somers JM, Moniruzzaman A, Currie LB, Rezansoff SN, Russolillo A, Parpouchi M. Accuracy of Reported Service Use in a Cohort of People Who are Chronically Homeless and Seriously Mentally Ill. *BMC Psychiatry*. *BMC Psychiatry*; 2016 Feb 23;16(41):1–7.

# BMJ Open

## Indigenous and Non-Indigenous People Experiencing Homelessness and Mental Illness in Two Canadian Cities: A Retrospective Analysis and Implications for Culturally Informed Action

|                                 |                                                                                                                                                                                                                                                                                                                                                                                                                                                   |
|---------------------------------|---------------------------------------------------------------------------------------------------------------------------------------------------------------------------------------------------------------------------------------------------------------------------------------------------------------------------------------------------------------------------------------------------------------------------------------------------|
| Journal:                        | <i>BMJ Open</i>                                                                                                                                                                                                                                                                                                                                                                                                                                   |
| Manuscript ID                   | bmjopen-2018-024748.R1                                                                                                                                                                                                                                                                                                                                                                                                                            |
| Article Type:                   | Research                                                                                                                                                                                                                                                                                                                                                                                                                                          |
| Date Submitted by the Author:   | 30-Jan-2019                                                                                                                                                                                                                                                                                                                                                                                                                                       |
| Complete List of Authors:       | Bingham, Brittany; Simon Fraser University, Health Sciences<br>Moniruzzaman, Akm; Simon Fraser University,<br>Patterson, Michelle; Simon Fraser University, Health Sciences<br>Distasio, Jino; University of Winnipeg, Geography<br>Sareen, J; University of Manitoba, Department of Community Health<br>O'Neil, John; Simon Fraser University, Faculty of Health Sciences<br>Somers, Julian; Simon Fraser University, Faculty of Health Sciences |
| <b>Primary Subject Heading</b>: | Health services research                                                                                                                                                                                                                                                                                                                                                                                                                          |
| Secondary Subject Heading:      | Health policy, Health services research, Mental health, Addiction, Evidence based practice                                                                                                                                                                                                                                                                                                                                                        |
| Keywords:                       | Indigenous health, Homelessness, substance use, service use, health equity, MENTAL HEALTH                                                                                                                                                                                                                                                                                                                                                         |
|                                 |                                                                                                                                                                                                                                                                                                                                                                                                                                                   |

SCHOLARONE™  
Manuscripts

1  
2  
3 Indigenous and Non-Indigenous People Experiencing Homelessness and Mental  
4 Illness in Two Canadian Cities: A Retrospective Analysis and Implications for  
5 Culturally Informed Action  
6  
7

8 **AUTHORS:**

9 **Corresponding Author:**

10 **Brittany Bingham, BA, MPH**

11 PhD Candidate

12 Simon Fraser University

13 Faculty of Health Sciences

14 8888 University Drive, Blusson Hall

15 Burnaby, BC

16 V5A1S6

17 bld@sfu.ca

18 Tel: 604-315-8865  
19

20  
21 **Akm Moniruzzaman, PhD**

22 Research Associate

23 Simon Fraser University

24 akm\_moniruzzaman@sfu.ca  
25

26 **Michelle Patterson, PhD**

27 Adjunct Professor

28 Simon Fraser University

29 Faculty of Health Sciences

30 michelle\_patterson@sfu.ca  
31

32 **Jino Distasio, PhD**

33 Director, Institute of Urban Studies

34 Vice President of Research and Innovation

35 University of Winnipeg

36 j.distasio@uwinnipeg.ca  
37  
38

39 **Jitender Sareen, MD, FRCPC**

40 Professor & Head of Psychiatry

41 Professor Psychology and Community Health Sciences

42 University of Manitoba

43 sareen@umanitoba.ca  
44

45 **John O'Neil, PhD**

46 Professor

47 Faculty of Health Sciences

48 Simon Fraser University

49 joneil@sfu.ca  
50  
51

52 **Julian M Somers, MSc, PhD, RPsych**

53 Professor

54 Simon Fraser University

55 Faculty of Health Sciences

56 jsomers@sfu.ca  
57  
58  
59  
60

1  
2  
3  
4 Word Count Abstract: 281  
5

6  
7 Word Count Body: 4009  
8  
9  
10  
11  
12  
13  
14  
15  
16  
17  
18  
19  
20  
21  
22  
23  
24  
25  
26  
27  
28  
29  
30  
31  
32  
33  
34  
35  
36  
37  
38  
39  
40  
41  
42  
43  
44  
45  
46  
47  
48  
49  
50  
51  
52  
53  
54  
55  
56  
57  
58  
59  
60

For peer review only

**Key words: homelessness, Indigenous, mental health, substance use, service use**

## **ABSTRACT**

### **Objectives:**

Indigenous people in Canada are not only overrepresented among the homeless population but their pathways to homelessness may differ from those of non-Indigenous people. This study investigated the history and current status of Indigenous and non-Indigenous people experiencing homelessness and mental illness. We hypothesized that compared to non-Indigenous people, those who are Indigenous would demonstrate histories of displacement earlier in life, higher rates of trauma and self-medication with alcohol and other substances.

**Design and Setting:** Retrospective data were collected from a sample recruited through referral from diverse social and health agencies in Winnipeg and Vancouver.

**Participants:** Eligibility included being 19 years or older, current mental disorder and homelessness.

**Measures:** Data was collected via interviews, using questionnaires, on socio-demographics (e.g., age, ethnicity, education), mental illness, substance use, physical health, service use and quality of life. Univariate and multivariable models were used to model the association between Indigenous ethnicity and dependent variables.

**Results:** A total of 1010 people met the inclusion criteria, of whom 439 self-identified as Indigenous. In adjusted models, Indigenous ethnicity was independently associated with being homeless at a younger age, having a lifetime duration of homelessness longer than 3 years, post-traumatic stress disorder, less severe mental disorder, more severe substance use in the past month and infectious disease. Indigenous participants were also nearly twice as likely as others (47% vs. 25%) to have children younger than 18 years.

**Conclusions:** Among Canadians who are homeless and mentally ill, those who are Indigenous have distinct histories and current needs that are consistent with the legacy of colonization. Responses to Indigenous homelessness must be developed within the context of reconciliation between Indigenous and non-Indigenous Canadians, addressing trauma, substance use, and family separations.

**Trial Registration:** This trial has been registered with the International Standard Randomized Control Trial Number Register and assigned ISRCTN42520374; ISRCTN57595077; ISRCTN66721740.

### **Strengths and Limitations of this Study:**

- A large sample and validated self-report measures.
- First multi-site investigation of distinct needs among Indigenous homeless.
- Demonstration that Indigenous and non-Indigenous homeless individuals have needs that correspond to differences in their historical experiences.
- Symptoms of mental illness and substance use and recollection of past events may have influenced responses.
- Indigenous ethnicity may have been underreported due to concerns regarding stigma or discrimination.



## BACKGROUND

Indigenous<sup>1</sup> people are overrepresented among homeless populations in every part of the world where these rates are documented (1). Indigenous people struggling with mental illness, substance use or homelessness often share experiences involving structural inequities and trauma related to colonization. Despite a visible presence of Indigenous peoples in the urban homeless populations of North America, Australia and New Zealand, there is limited research investigating the prevalence and causes of Indigenous homelessness (1). Indigenous Australians comprise 9% of the homeless population compared to 3.3% of the general population. Similarly, in New Zealand, Maori homelessness has been reported to be five times that of non-Maori (1). In Canada, homelessness among Indigenous peoples' is eight times more prevalent than among all others (2). Indigenous people comprise about 6% of British Columbia's population, yet in 2018 accounted for 40% of Vancouver's homeless of whom close to half are unsheltered (46%) (3). The Vancouver area is home to approximately 62,000 Indigenous people representing 23% of B.C.'s Indigenous population (4). Women accounted for 53% of the Indigenous homeless people in Vancouver, and 46% were under 25 (3). Homelessness among youth has increased in Vancouver, with those under 25 representing 24% of the overall homeless population [31].

Pathways to homelessness integrate poverty, mental illness, addiction, lack of affordable housing, and socio-economic inequities (5-7). The high prevalence of mental illness among the homeless (8,9) is related to sustained disinvestment in institutional models of care and insufficient attention to the design and implementation of community-based approaches to delivering housing and support (10). Fragmentation between systems responsible for health care and social services amplifies the challenges faced by people who

---

<sup>1</sup> The term 'Indigenous' will be used throughout this paper to collectively describe the Indigenous peoples of Canada, inclusive of those who identify as 'Aboriginal', or First Nations, Métis and Inuit. This term is used while also acknowledging the diversity of cultures, languages and traditions that exist among Indigenous Canadians.

1  
2  
3 are mentally ill and homeless (9). Many marginalized and homeless people must navigate a  
4 maze of multiple systems to receive essential supports, leading one scholar to describe  
5 them as “system survivors”(9). Multidisciplinary models integrating primary care and  
6 specialized services have been recommended for people with multiple and complex needs  
7 (11).  
8  
9

10  
11  
12  
13  
14 Indigenous pathways to homelessness are likely inclusive of the above factors. In  
15 addition, current inequities in the health of Indigenous peoples are directly related to past  
16 and present colonial policies that created and sustain systemic racism, cultural oppression,  
17 disempowerment and dispossession of Indigenous peoples’ lands (2,5,12). The Indian Act  
18 (1876) and related policies served to dispossess Indigenous peoples of land, disrupt the  
19 practice and transmission of traditional knowledge, undermine the matriarchal role of  
20 women, and remove generations of children from their communities into settings where  
21 abuse was widespread. Canada’s Truth and Reconciliation Commission (TRC) identified the  
22 residential school era as the beginning of intergenerational cycles of trauma for Indigenous  
23 Canadians (13,14), and concluded that the actions taken under the Indian Act and related  
24 policies amounted to “cultural genocide”(13).  
25  
26  
27  
28  
29  
30  
31  
32  
33  
34  
35  
36  
37

38 Child welfare policies continue to separate Indigenous children from their families  
39 and communities. Indigenous youth are vastly over-represented in the child welfare system  
40 and foster care, disrupting Indigenous families and contributing to homelessness (2). In  
41 Canada, Indigenous children and youth are fifteen times more likely to be in government  
42 care than non-Indigenous children and youth (14). The “60’s scoop” refers to a time at the  
43 height of the residential school era in the 50’s and 60’s, where an amendment to the  
44 Canadian Indian Act gave provinces authority over their child protection policies, leading to  
45 a dramatic increase in the number of Indigenous children in the child welfare system.  
46  
47  
48  
49  
50  
51  
52  
53  
54 Trauma arising from these experiences affects communities across generations (14).  
55  
56  
57  
58  
59  
60

1  
2  
3           These differences have led to the development of a distinct definition of Indigenous  
4 homelessness in Canada: “Unlike the common colonialist definition of homelessness,  
5 Indigenous homelessness is not defined as lacking a structure of habitation; rather, it is  
6 more fully described and understood through a composite lens of Indigenous worldviews.  
7 These include: individuals, families and communities isolated from their relationships to  
8 land, water, place, family, kin, each other, animals, cultures, languages and identities.  
9 Importantly, Indigenous people experiencing these kinds of homelessness cannot culturally,  
10 spiritually, emotionally or physically reconnect with their Indigeneity or lost  
11 relationships”(15). A related insight can be found in the final report of the TRC, which  
12 examined the urgent and complex relationships between Indigenous and non-Indigenous  
13 peoples in Canada and does not mention the term “homelessness” at all, but includes the  
14 term “home” 146 times, usually in the context of loss and enforced separation (13).

15  
16           Among relevant empirical studies, disparities have been reported concerning  
17 Indigenous peoples’ access to appropriate and responsive primary health care (16-18).  
18 Pervasive racism and discrimination against Indigenous peoples in the Canadian health care  
19 system has been widely reported and in many cases has led to Indigenous patients  
20 strategizing for how to avoid racism before seeking care or avoiding care altogether (16,19).  
21 Despite the high need for mental health, substance use and health care among homeless  
22 populations there remain substantial gaps in research examining the implications of  
23 historical and current differences between Indigenous and non-Indigenous peoples as they  
24 relate to policies and services addressing homelessness. The need for further research into  
25 the effects of ethnicity on homelessness has been well established (20). Indeed, few studies  
26 have examined the potential upstream causal factors that contribute to the  
27 overrepresentation of Indigenous people among the homeless (1). Such information is  
28 essential to the development of effective policies.

1  
2  
3 The current study investigated differences between Indigenous and non-Indigenous  
4 people who experienced homelessness and mental illness, and whether differences are  
5 consistent with distinct trajectories leading to homelessness. We hypothesized that  
6 Indigenous participants would be more likely to have experienced homelessness earlier in  
7 life and have higher prevalence of trauma and substance use, and that non-Indigenous  
8 participants would be more likely to experience serious mental illness such as  
9 schizophrenia.  
10  
11  
12  
13  
14  
15  
16  
17  
18

## 19 **METHODS**

### 20 **Ethics Statement**

21 This study sample was recruited for the following experimental trials:  
22  
23  
24  
25  
26  
27  
28  
29  
30  
31  
32  
33  
34  
35  
36  
37  
38  
39  
40  
41  
42  
43  
44  
45  
46  
47  
48  
49  
50  
51  
52  
53  
54  
55  
56  
57  
58  
59  
60  
This study sample was recruited for the following experimental trials:  
ISRCTN42520374; ISRCTN57595077; ISRCTN66721740. All variables were collected pre-  
randomization. Ethical review and approval was conducted by the Research Ethics Boards  
at Simon Fraser University, the University of British Columbia and the University of  
Manitoba with endorsement from the University of Winnipeg.

### 35 **Data Source and Sample**

37 The At Home/Chez Soi study took place in five Canadian cities and enrolled  
38 participants who were homeless and mentally ill (21,22). The current study includes  
39 baseline data from Vancouver and Winnipeg, the sites with the highest proportions of  
40 Indigenous people who are homeless. Further details related to the trial protocols and  
41 methods that are not essential to the current study have been published elsewhere (21,22).  
42  
43  
44  
45  
46  
47

48 Eligibility criteria included being a legal adult (19 years or older), current mental  
49 disorder, and being absolutely or precariously housed. Absolute homelessness was defined  
50 as having no place to stay for more than seven nights and little likelihood of finding a place  
51 in the next month (21). Precarious housing referred to living in a rooming house, hotel or  
52 transitional housing, and having at least two episodes of homelessness, as defined above, in  
53  
54  
55  
56  
57  
58  
59  
60

1  
2  
3 the past year (21,22). Participants were recruited through referral from diverse agencies  
4 including: homeless shelters; drop in centers; homeless outreach teams; hospitals;  
5  
6 community mental health team and criminal justice programs. Organizations that serve  
7  
8 women, youth, Indigenous peoples and gay/lesbian/transgender were targeted to obtain a  
9  
10 diverse sample.  
11  
12

13  
14 An initial face-to-face interview was conducted to determine if referred individuals  
15 met the inclusion criteria. Upon meeting criteria, participants completed written informed  
16 consent obtained by the interviewer and were enrolled and administered the baseline  
17 questionnaire that included information on socio-demographics, mental illness, substance  
18 use, physical health, service use and quality of life. Participants were not eligible for  
19 recruitment if they could not give informed consent. Consent procedures were tested prior  
20 to study implementation (23) and interviewers were trained by senior clinicians with  
21 ongoing support from a clinical psychologist and psychiatry resident. Interviews were  
22 postponed or rescheduled if a participant was unable to give informed consent to the study  
23 details (e.g., randomization) for any reason [22]. Participants received a cash honorarium of  
24 \$30 upon completion of the baseline interview and \$20 for each subsequent interview.  
25  
26 Results are based on data from the baseline questionnaires of 497 Vancouver participants  
27 and 513 Winnipeg participants.  
28  
29  
30  
31  
32  
33  
34  
35  
36  
37  
38  
39  
40  
41  
42

### 43 **Patient and Public Involvement**

44  
45 Indigenous people and community stakeholders were engaged in the development  
46 and implementation of this research. Community meetings (including advertised open  
47 meetings) and six focus groups were conducted with key informants [22]. In total, 58  
48 individuals were convened and met with a facilitator who prepared reports of the  
49 proceedings. Focus group participants advised on procedures, reducing risks and  
50 maximizing benefits to participants and on how to incorporate the expertise of individuals  
51  
52  
53  
54  
55  
56  
57  
58  
59  
60

1  
2  
3 with direct experience of homelessness into the study. Narrative feedback from participants  
4  
5 was incorporated into the grant application and the project. Service providers were also  
6  
7 consulted extensively during the design of the research. More specifically, in Winnipeg,  
8  
9 where Indigenous homelessness was a specific focus, an Indigenous research steering  
10  
11 committee was created, comprised of elders and traditional teachers, to provide cultural  
12  
13 advice and guidance to the research team to ensure that Indigenous perspectives were  
14  
15 incorporated. In addition, a Lived Experience Circle (LEC) was created which honoured and  
16  
17 promoted Indigenous lived experience through the research. In Winnipeg, persons with  
18  
19 lived experience (PWLE) were involved in multiple roles on the project as representatives  
20  
21 on an advisory committee and employed as research staff. PWLE assisted in facilitating  
22  
23 integrated knowledge exchange, working with staff of the interventions and directly to  
24  
25 bring patient perspectives into the research and interventions. Since completion of the trial,  
26  
27 across all study sites findings have been reported at a variety of academic forums  
28  
29 distributed to diverse audiences including provincial governments, municipalities, health  
30  
31 authorities and community agencies. In April 2018, a forum was held where key members  
32  
33 of community service organizations that work with Indigenous people who are homeless  
34  
35 were invited to review study results, provide their recommendations and guide the  
36  
37 interpretation of meaning. The current findings will be disseminated following publication  
38  
39 via the established network of local service providers, stakeholders and participants of the  
40  
41 research forum.  
42  
43  
44  
45

## 46 **Variables of Interest**

47  
48  
49 Indigenous or Aboriginal ethnicity status was derived from self-report. Participants  
50  
51 were asked if they identify as “Aboriginal” and to check all that apply: Inuit, Métis, First  
52  
53 Nations status, First Nations non-status, Indigenous from outside Canada and other. For the  
54  
55 purposes of these analyses participants who identified as any of these categories of  
56  
57  
58  
59

1  
2  
3 “Aboriginal” were considered to be Indigenous. The cluster of severe mental disorders  
4 includes at least one of current (i.e. past month) Psychotic Disorder, mood disorder with  
5 psychotic features, and hypomanic or manic episode, as identified through the MINI  
6 International Neuropsychiatric Interview 6.0 (MINI)[24]. The MINI is a structured, short  
7 diagnostic interview often used for psychiatric evaluation and outcome tracking, with an  
8 administrative time of about 15 minutes. The less severe cluster includes at least one of  
9 current major depressive episode, panic disorder and posttraumatic stress disorder (PTSD).  
10 In addition, diagnosis of alcohol and substance dependence was assessed determined using  
11 the MINI. Substance use severity in the past month was assessed using the GAIN SPS (Global  
12 Assessment of Individual Need – Substance Problem Scale), a 16 item subscale that  
13 integrates research and clinical assessment for people presenting for substance abuse  
14 treatment [21]. Frequency of use included all illicit drugs and alcohol. Blood borne  
15 infectious disease was based on a positive self-report diagnosis of HIV, Hepatitis B, or  
16 Hepatitis C. Self-reported involvement with health services was collected for the past 6  
17 months including visiting a: Family doctor, Psychiatrist, Emergency room (ER) and being  
18 transported by ambulance to an ER. Access to health care was elicited by the questions “Is  
19 there a place that you usually go to when you’re sick or in need of advice about your  
20 health?” and “In the past 6 months, was there ever a time when you needed health care but  
21 you did not receive it?” Criminal justice services included: Contact with the police that did  
22 not result in arrest; contacts that resulted in arrest; or being held in a police cell for less  
23 than 24 hours. Rates of imprisonment were not differentiated from this item. However,  
24 further analysis of administrative records for the Vancouver sample found that 14% had  
25 been in custody during the six months prior to study recruitment [25]. Participants were  
26 categorized as either moderate needs (MN) or high needs (HN). Inclusion in the HN  
27 category was based on a score of 62 or lower on the Multnomah Community Ability Scale  
28 (MCAS) or current bipolar or psychotic disorder as well as one of the following: legal  
29  
30  
31  
32  
33  
34  
35  
36  
37  
38  
39  
40  
41  
42  
43  
44  
45  
46  
47  
48  
49  
50  
51  
52  
53  
54  
55  
56  
57  
58  
59  
60

1  
2  
3 involvement in the past year; substance dependence in the past month; and two or more  
4 hospitalizations for mental illness in the past 5 years [26]. All other eligible participants  
5 were categorized as MN in the study [22]. The MCAS is a 17-item scale measuring the  
6 degree of functional ability through 17 indicators. Indicators are rated into a 5-point scale  
7 across health, coping, social and behavioural domains. Detailed descriptions and  
8 psychometric information for study instruments is published in the At Home/Chez Soi Trial  
9 protocol [21].  
10  
11  
12  
13  
14  
15  
16  
17  
18

### 19 **Statistical Analysis**

20  
21 Pearson Chi-square or Fisher's exact test were used to conduct comparisons  
22 between baseline socio-demographic characteristics for Vancouver and Winnipeg  
23 participants and to make comparisons between Indigenous and non-Indigenous  
24 participants. Comparisons of numeric variables (e.g. age at enrolment) between groups  
25 were conducted using the Student t test and Wilcoxon's rank-sum test. Comparisons were  
26 conducted across socio-demographic variables, homelessness variables, mental health,  
27 substance use, health conditions and service use for individuals of Indigenous vs. non-  
28 Indigenous ethnicity. Univariate and multivariate logistic regression analyses were used to  
29 model the independent associations between Indigenous ethnicity and a series of outcome  
30 variables. Statistical significance (variables that were significant at the  $p < 0.05$  level) as well  
31 as subjective assessment were considered to select outcome variables for the multivariable  
32 logistic regression analyses. The multivariable model adjusted for potentially confounding  
33 variables which may have been unevenly distributed based on ethnicity [22,27]. The  
34 following controlling variables were used for the multivariable model: age (continuous);  
35 gender (man, woman); need level (high, moderate); marital status (single, other); site  
36 (Vancouver, Winnipeg); education (completed high school, incomplete high school); have  
37  
38  
39  
40  
41  
42  
43  
44  
45  
46  
47  
48  
49  
50  
51  
52  
53  
54  
55  
56  
57  
58  
59  
60



1  
2  
3 children (under age 18). Both unadjusted and adjusted odds ratios and 95% Confidence  
4 intervals (CI) are reported. SPSS Version 21 was used to conduct these analyses.  
5  
6

## 7 **RESULTS**

8  
9 Descriptive characteristics of participants recruited in Vancouver (n=497) and  
10 Winnipeg (n=513) are presented in Table 1. In Vancouver, the mean age of participants was  
11 41 years (SD=11) and the majority were male (73%), White (56%), single/never married  
12 (70%), and had not completed high school (57%). In Winnipeg, the mean age of participants  
13 (n=513) was 39 years (SD=11) and the majority were male (64%), Indigenous (71%),  
14 single/never married (70%), and had not completed high school (69%). Participants at the  
15 Vancouver and Winnipeg sites significantly differed with respect to: Need level; gender;  
16 ethnicity; education; hospitalizations; arrests; housing status; mental illness severity; and  
17 suicidality ( $p \leq 0.05$ ).  
18  
19  
20  
21  
22  
23  
24  
25  
26  
27

28 Univariate comparisons between Indigenous (439) and non-Indigenous (571)  
29 samples from both study sites are presented in Table 2. The majority of Indigenous  
30 participants met criteria for the moderate needs condition (59%), were male (61%), had  
31 not completed high school (75%) and had a lifetime duration of homelessness greater than  
32 three years (52%). Compared to non-Indigenous participants, Indigenous participants were  
33 more likely to have children under the age of 18 (52% vs. 25%) and were first homeless at a  
34 younger age (63% vs. 51% reporting being first homeless before the age of 30).  
35  
36  
37  
38  
39  
40  
41  
42  
43

44 Effect size estimates as unadjusted and adjusted odds ratios (UOR and AOR) and  
45 95% confidence intervals (CI) are presented in Table 3. Results from multivariable logistic  
46 regression analyses indicate that self-reported Indigenous ethnicity independently  
47 predicted a younger age first homeless <25 years (AOR: 1.56; 95%CI= 1.06-2.27), a longer  
48 lifetime duration of homelessness (more than 3 years) (AOR: 1.41; 95%CI= 1.01-2.0), Post-  
49 Traumatic Stress Disorder (PTSD) (AOR: 1.91; 95%CI= 1.35-2.70), not meeting criteria for  
50 "severe" mental disorder (AOR: 1.72; 95%CI= 1.16-2.56), alcohol dependence (AOR: 2.64,  
51  
52  
53  
54  
55  
56  
57  
58  
59  
60

1  
2  
3 95% CI: 1.90, 3.68), more severe substance use in the past month (AOR: 2.43; 95%CI= 1.67-  
4  
5 3.56) and infectious blood borne diseases (AOR: 1.59; 95%CI= 1.08-2.34).  
6  
7

## 8 **DISCUSSION**

9 Our findings suggest that the trajectories leading to homelessness among  
10  
11 Indigenous and non-Indigenous people differ meaningfully from each other, and that they  
12  
13 can be understood as consequences of harmful government policies. Consistent with the  
14  
15 legacy of colonization and cultural genocide, when compared to others, Indigenous  
16  
17 participants experienced homelessness and first used substances at a younger age, spent  
18  
19 more of their lives living homeless, were more frequently taken by ambulance to hospital,  
20  
21 and were more likely to meet criteria for PTSD, severe substance use, and have an infectious  
22  
23 disease. Conversely, non-Indigenous participants were more likely to meet criteria for  
24  
25 schizophrenia or other severe mental illness, suggesting links to deinstitutionalization and  
26  
27 the inadequate implementation of alternative community-based treatment. These  
28  
29 differences require consideration in the development of culturally-appropriate housing and  
30  
31 support services that are specific to the needs of Indigenous and non-Indigenous peoples.  
32  
33 Programs for Indigenous people must prevent homelessness early in life, stemming the  
34  
35 grossly disproportionate rates of removal of Indigenous children and youth into state  
36  
37 administered foster care [14,28].  
38  
39  
40

41 Within our sample of Indigenous people, we found that almost half of the  
42  
43 participants met criteria for PTSD (49% compared to 26% among non-Indigenous),  
44  
45 consistent with a significant body of literature documenting the historical and continuing  
46  
47 trauma experienced by Indigenous people in Canada [29-31]. Bombay and colleagues  
48  
49 (2009), proposed that trauma can be transmitted across generations, based on findings that  
50  
51 children of trauma survivors were more likely to have negative responses to stressors and  
52  
53 more likely to develop PTSD or depression as a result [29,30]. Intergenerational trauma  
54  
55  
56  
57  
58  
59  
60

1  
2  
3 represents a complex subtype of PTSD that must be addressed in housing interventions for  
4  
5 Indigenous people.  
6

7           Indigenous homeless participants in our study were significantly more likely to have  
8  
9 used drugs at a younger age (13 years) compared to non-Indigenous participants.  
10

11 Indigenous participants were also more likely to report severe substance use in the past  
12  
13 month. These findings are consistent with research involving non-homeless samples and  
14  
15 showing that Indigenous youth compared to non-Indigenous youth have a higher likelihood  
16  
17 of experimenting with substances at a younger age and using substances persistently into  
18  
19 adulthood [32,33]. Early initiation into drug use poses a significant risk for adverse  
20  
21 outcomes such as infectious disease and other morbidity or mortality. Youth who initiated  
22  
23 injection drug use at an earlier age have been found to be more likely to become infected  
24  
25 with HIV and Hepatitis C, demonstrating the need for targeted and early intervention for  
26  
27 youth at risk of drug use [34]. Observers have consistently reported that Indigenous youth  
28  
29 are at disproportionately high risk for problematic substance use. However, few studies  
30  
31 have investigated the protective factors related to substance use trajectories for Indigenous  
32  
33 youth [35]. Mainstream substance use treatment models have demonstrated limited success  
34  
35 for Indigenous people [36]. This may be because the factors responsible for substance use,  
36  
37 (as well as homelessness and trauma) are unique to the experience of Indigenous people,  
38  
39 and require “treatments” that restore and rebuild Indigenous culture and rights.  
40  
41  
42  
43

44 Approaches that create reconnection to community, culture and traditions have been shown  
45  
46 to have a positive impact on substance use [36]. Rawana & Ames reported that optimism,  
47  
48 participation in recreational activities, and attendance at religious or spiritual services were  
49  
50 found to be protective against alcohol misuse for Indigenous youth [35]. Prevention and  
51  
52 early intervention of problematic substance use among Indigenous youth is urgently  
53  
54 required in on-reserve and urban settings. Culturally relevant curricula, increased access to  
55  
56  
57  
58  
59  
60

1  
2  
3 psychosocial supports, youth recreation and peer support models and trauma informed  
4 services are also required.  
5  
6

7 In the 2016 in the Metro Vancouver homeless count, homeless youth had increased  
8 to the highest level recorded in the region with 397, or 24% of the overall homeless  
9 population, under the age of 25. Youth reported that they had been affected by the lack of  
10 youth services or cuts to youth programs from one or more levels of government [37].  
11 Street involved youth often fall between services tailored to children or adults, and this  
12 issue is further complicated for Indigenous youth in the child welfare system who age out of  
13 many system supports upon adulthood [27,38]. Developmental resources grounded in  
14 Indigenous cultural practices are required to prevent homelessness among youth who are  
15 transitioning from foster care settings and also to support youth who experienced trauma  
16 in foster care settings [27,38].  
17  
18  
19  
20  
21  
22  
23  
24  
25  
26  
27  
28

29 Indigenous participants in both sites were significantly more likely than non-  
30 Indigenous people to have a regular medical doctor and were also more likely to have been  
31 taken to the hospital by an ambulance in the past 6 months. This seemingly contradictory  
32 finding may indicate that medical care alone is insufficient to prevent acute emergencies  
33 caused by environmental, social, and historical harms. Moreover, emergency room visits  
34 may be for reasons other than those typically addressed in a primary care setting such as  
35 acute psychotic symptoms, overdose, acute trauma, and other serious health complications  
36 caused by long-term homelessness. Further research is required to investigate the impact of  
37 stigma and discrimination on service utilization for Indigenous people who are homeless  
38 and the need for culturally safe services for this population.  
39  
40  
41  
42  
43  
44  
45  
46  
47  
48  
49

50 The use of ambulance services for those who are homeless and mentally ill is  
51 indicative of the lack of essential supports to sustain wellness. Consistent with research  
52 with non-homeless samples, we found that Indigenous participants were more likely than  
53 non-Indigenous people to report positive status for HIV, Hepatitis C or Hepatitis B Virus  
54  
55  
56  
57  
58  
59  
60

1  
2  
3 [39,40]. Marshall and colleagues examined HIV prevalence among street-involved youth  
4 and found that Indigenous ethnicity was a correlate of HIV infection and that Hepatitis C co-  
5 infection was less common among Indigenous participants [39]. Indigenous people also face  
6 disparities in HIV outcomes and treatment, as they are likely to be diagnosed and initiate  
7 treatment later than non-Indigenous patients. Indigenous people have been noted to suffer  
8 higher mortality even after receiving antiretroviral treatment, suggesting that social  
9 determinants may need to be addressed in order to realize the expected effectiveness of  
10 medical treatment [40]. Interventions must consider the inter-generational context of  
11 Indigenous homelessness, and promote the health of children through investments in  
12 families and communities.  
13  
14  
15  
16  
17  
18  
19  
20  
21  
22  
23

24 This analysis has strengths and limitations. Strengths of the study include a large  
25 sample size, structured diagnostic interviews, and self-report measures validated against  
26 administrative data sources [25]. Limitations include the possibility that current mental  
27 illness or substance use symptoms may have compromised some participant responses.  
28  
29 Although participants were asked if they were First Nations, Inuit, Métis and status vs. non-  
30 status the current study did not allow for analysis to elicit unique differences between these  
31 smaller and distinct groups. It is recommended that further research investigate the  
32 differences between First Nations, Métis and Inuit service needs as well as differences  
33 between those recognized as status and non-status under the Indian Act to elucidate the  
34 diversity of service needs within Indigenous groups. Finally, we relied on self-reported  
35 ethnicity and it is possible that Indigenous people may not have self-identified due to  
36 concerns related to stigma and discrimination.  
37  
38  
39  
40  
41  
42  
43  
44  
45  
46  
47  
48  
49

## 50 **Implications**

51 Pathways leading to homelessness differ meaningfully between Indigenous and  
52 non-Indigenous adults who meet criteria for current homelessness and mental illness.  
53  
54 Consistent with our hypotheses, Indigenous participants experienced homelessness at a  
55  
56  
57  
58  
59  
60

1  
2  
3 younger age, were homeless longer, had greater substance-related problems, less formal  
4  
5 education, more health emergencies, and higher rates of infectious disease than non-  
6  
7 Indigenous participants. Indigenous participants were also significantly more likely to  
8  
9 satisfy our study's "mental illness" criterion with PTSD, while non-Indigenous participants  
10  
11 were more likely to meet criteria for Schizophrenia or Bipolar Disorder. Our findings are  
12  
13 consistent with the view that solutions to Indigenous homelessness – both prevention and  
14  
15 treatment – must involve practices that restore social and cultural power to Indigenous  
16  
17 communities. By contrast, non-Indigenous participants showed strong indications for the  
18  
19 appropriateness of housing and assertive community treatment, as promised by  
20  
21 governments during the era of deinstitutionalization. Further research is needed to  
22  
23 replicate these findings in other regions and where the historical experiences of Indigenous  
24  
25 peoples differ based on varying degrees of political and social autonomy and the  
26  
27 preservation of cultural practices.  
28  
29  
30  
31  
32  
33  
34  
35  
36  
37  
38  
39  
40  
41  
42  
43  
44  
45  
46  
47  
48  
49  
50  
51  
52  
53  
54  
55  
56  
57  
58  
59  
60

**Table 1: Socio-demographic, mental health, substance use and service use characteristics for Vancouver and Winnipeg at Home Study Participants (N=1010)**

| Variable                                                                           | Vancouver Site<br>N (%)<br><b>497(49.2)</b> | Winnipeg Site<br>N (%)<br><b>513(50.8)</b> | P-Value         |
|------------------------------------------------------------------------------------|---------------------------------------------|--------------------------------------------|-----------------|
| <b>Need Level</b>                                                                  |                                             |                                            |                 |
| High Need                                                                          | 297(59.8)                                   | 199(38.8)                                  | <b>&lt;.001</b> |
| Moderate Need                                                                      | 200(40.2)                                   | 314(61.2)                                  |                 |
| <b>Gender</b>                                                                      |                                             |                                            |                 |
| Male                                                                               | 359(72.8)                                   | 326(63.8)                                  | <b>.002</b>     |
| Female                                                                             | 134(27.2)                                   | 185(36.2)                                  |                 |
| <b>Age at Enrollment</b>                                                           |                                             |                                            |                 |
| Youth                                                                              | 36(7.2)                                     | 64(12.5)                                   |                 |
| 25-44 Years                                                                        | 281(56.5)                                   | 277(54.0)                                  |                 |
| 44 Plus Years                                                                      | 180(36.2)                                   | 172(33.5)                                  |                 |
| <b>Ethnicity</b>                                                                   |                                             |                                            |                 |
| Indigenous                                                                         | 77(15.5)                                    | 362(70.6)                                  | <b>&lt;.001</b> |
| White                                                                              | 280(56.3)                                   | 112(21.8)                                  |                 |
| Mixed/Other                                                                        | 140(28.2)                                   | 39(7.6)                                    |                 |
| <b>Education</b>                                                                   |                                             |                                            |                 |
| High School or Higher                                                              | 214(43.3)                                   | 157(30.7)                                  | <b>&lt;.001</b> |
| Less than High School                                                              | 280(56.7)                                   | 354(69.3)                                  |                 |
| <b>Marital Status</b>                                                              |                                             |                                            |                 |
| Single (never married)                                                             | 343(69.6)                                   | 359(70.3)                                  | .971            |
| Married/Partner                                                                    | 25(5.1)                                     | 25(4.9)                                    |                 |
| Separated/Widow/divorced                                                           | 125(25.4)                                   | 127(24.9)                                  |                 |
| <b>Have Children (under 18)</b>                                                    | 122(25.1)                                   | 238(47.1)                                  | <b>&lt;.001</b> |
| <b>Hospitalized for mental illness over 6 months in past 5 years</b>               | 57(11.7)                                    | 23(4.5)                                    | <b>&lt;.001</b> |
| <b>Hospitalized for mental illness over 2 times in the past 5 years</b>            | 253(52.7)                                   | 111(21.9)                                  | <b>&lt;.001</b> |
| <b>Arrested/Imprisoned/Probation/Community sanction in past 6 months</b>           | 221(45.2)                                   | 179(35.0)                                  | <b>.001</b>     |
| <b>Spend 1 or more night in hospital, detox, shelter and jail in past 6 months</b> | 65(84.4)                                    | 321(88.7)                                  | .298            |
| <b>Length of Homelessness Lifetime</b>                                             |                                             |                                            |                 |
| 1-3 years                                                                          | 257(52.3)                                   | 262(53.0)                                  | .827            |
| 3 years plus                                                                       | 234(47.7)                                   | 232(47.0)                                  |                 |
| <b>Length of homelessness longest single period</b>                                |                                             |                                            |                 |
| 12 months                                                                          | 246(50.1)                                   | 227(46.9)                                  | .317            |
| 13-60 months                                                                       | 182(37.1)                                   | 192(39.7)                                  |                 |
| 60 months plus                                                                     | 63(12.8)                                    | 65(13.4)                                   |                 |
| <b>Age first homeless</b>                                                          |                                             |                                            |                 |
| 18 years or less                                                                   | 110(22.4)                                   | 138(27.2)                                  | .173            |
| 19-30 years                                                                        | 158(32.2)                                   | 151(29.8)                                  |                 |

|                                                                          |           |           |                 |
|--------------------------------------------------------------------------|-----------|-----------|-----------------|
| 31-40 years                                                              | 94(19.1)  | 106(20.9) |                 |
| Over 40 years                                                            | 129(26.3) | 112(22.1) |                 |
| <b>Housing Status</b>                                                    |           |           |                 |
| Absolutely Homeless                                                      | 388(78.1) | 354(69.1) | <b>.001</b>     |
| Precariously Housed                                                      | 109(21.9) | 158(30.9) |                 |
| <b>Mental Illness</b>                                                    |           |           |                 |
| Less severe mental illness                                               | 264(53.1) | 436(85.0) | <b>&lt;.001</b> |
| Multiple mental disorders ( $\geq 2$ )                                   | 240(48.3) | 338(65.9) | <b>&lt;.001</b> |
| PTSD                                                                     | 129(26.0) | 233(45.4) | <b>&lt;.001</b> |
| Current suicidality (high)                                               | 373(75.1) | 447(87.1) | <b>&lt;.001</b> |
| <b>Chronic Disease and Service Access</b>                                |           |           |                 |
| Blood borne diseases                                                     | 157(31.9) | 113(22.2) | <b>.001</b>     |
| Two or more physical illness                                             | 402(80.9) | 458(89.3) | <b>&lt;.001</b> |
| Have a regular medical doctor                                            | 320(64.5) | 337(65.7) | .695            |
| Place you usually go when you are sick or need advice about your health  | 395(80.8) | 430(84.1) | .161            |
| Needed health care, but did not receive it in past 6 months              | 209(43.2) | 278(55.0) | <b>&lt;.001</b> |
| <b>Substance Use</b>                                                     |           |           |                 |
| Current alcohol dependence                                               | 29(37.7)  | 261(72.1) | <b>&lt;.001</b> |
| Current Substance dependence                                             | 57(74.0)  | 183(50.6) | <b>&lt;.001</b> |
| Age first alcohol use (categorized by median) ( $\geq 14$ ; $\leq 13$ )  | 33(44.0)  | 140(39.9) | <b>.510</b>     |
|                                                                          | 42(56.0)  | 211(60.1) |                 |
| Age first drug use (After $\geq 14$ ; $\leq 13$ )                        | 37(49.3)  | 160(47.1) | <b>.721</b>     |
|                                                                          | 38(50.7)  | 180(52.9) |                 |
| GAIN Score - (0-3 less severe); (4-5 severe) substance use in past month | 34(48.6)  | 214(62.8) | <b>.027</b>     |
|                                                                          | 36(51.4)  | 127(37.2) |                 |



**Table 2: Socio-demographic, mental health, substance use and service use characteristics for Vancouver and Winnipeg at Home Study participants by Indigenous ethnicity (N=1010)**

| Variable                                                                              | Indigenous<br>N (%)<br>439(43.5%) | Non-Indigenous<br>N (%)<br>571(56.5%) | P-Value         |
|---------------------------------------------------------------------------------------|-----------------------------------|---------------------------------------|-----------------|
| <b>Need Level</b>                                                                     |                                   |                                       |                 |
| High Need                                                                             | 180(41.0)                         | 316(55.3)                             | <b>&lt;.001</b> |
| Moderate Need                                                                         | 259(59.0)                         | 255(44.7)                             |                 |
| <b>Gender</b>                                                                         |                                   |                                       |                 |
| Male                                                                                  | 265(61.1)                         | 420(73.7)                             | <b>&lt;.001</b> |
| Female                                                                                | 169(38.9)                         | 150(26.3)                             |                 |
| <b>Age at Enrollment</b>                                                              |                                   |                                       |                 |
| Youth                                                                                 | 53(12.1)                          | 47(8.2)                               | <b>.043</b>     |
| 25-44 Years                                                                           | 266(60.6)                         | 292(51.1)                             |                 |
| 44 Plus Years                                                                         | 120(27.3)                         | 232(40.6)                             |                 |
| <b>Education</b>                                                                      |                                   |                                       |                 |
| High School or Higher                                                                 | 110(25.2)                         | 261(46.0)                             | <b>&lt;.001</b> |
| Less than High School                                                                 | 327(74.8)                         | 307(54.0)                             |                 |
| <b>Marital Status</b>                                                                 |                                   |                                       |                 |
| Single (never married)                                                                | 313(71.6)                         | 389(68.6)                             | <b>.018</b>     |
| Married/Partner                                                                       | 29(6.6)                           | 21(3.7)                               |                 |
| Separated/Widow/divorced                                                              | 95(21.7)                          | 157(27.7)                             |                 |
| <b>Have Children (under 18)</b>                                                       | 222(51.5)                         | 138(24.6)                             | <b>&lt;.001</b> |
| <b>Hospitalized for mental illness over 6 months in past 5 years</b>                  | 22(5.1)                           | 58(10.3)                              | <b>.003</b>     |
| <b>Hospitalized for mental illness over 2 times in the past 5 years</b>               | 107(24.7)                         | 257(46.5)                             | <b>&lt;.001</b> |
| <b>Arrested/Imprisoned/Probation/<br/>community sanction in past 6 months</b>         | 171(39.0)                         | 229(40.7)                             | .585            |
| <b>Spent one or more nights in hospital, detox, shelter and jail in past 6 months</b> | 386(87.9)                         | 510(89.6)                             | .393            |
| <b>Length of Homelessness Lifetime</b>                                                |                                   |                                       |                 |
| 1-3 years                                                                             | 205(48.3)                         | 314(56.0)                             | <b>.018</b>     |
| 3 years plus                                                                          | 219(51.7)                         | 247(44.0)                             |                 |
| <b>Length of homelessness longest single period</b>                                   |                                   |                                       |                 |
| 12 months                                                                             | 189(45.2)                         | 284(51.0)                             | <b>.074</b>     |
| 13-60 months                                                                          | 166(39.7)                         | 208(37.3)                             |                 |
| 60 months plus                                                                        | 63(15.1)                          | 65(11.7)                              |                 |
| <b>Age first homeless</b>                                                             |                                   |                                       |                 |
| 18 years or less                                                                      | 130(30.0)                         | 118(20.9)                             | <b>&lt;.001</b> |
| 19-30 years                                                                           | 142(32.7)                         | 167(29.6)                             |                 |
| 31-40 years                                                                           | 86(19.8)                          | 114(20.2)                             |                 |
| Over 40 years                                                                         | 76(17.5)                          | 165(29.3)                             |                 |
| <b>Housing Status</b>                                                                 |                                   |                                       |                 |
| Absolutely Homeless                                                                   | 309(70.4)                         | 433(76.0)                             | <b>.046</b>     |
| Precariously Housed                                                                   | 130(29.6)                         | 137(24.0)                             |                 |
| <b>Mental Illness</b>                                                                 |                                   |                                       |                 |

|                                                                          |           |           |                 |
|--------------------------------------------------------------------------|-----------|-----------|-----------------|
| Less severe mental illness                                               | 370(84.3) | 330(57.8) | <b>&lt;.001</b> |
| Multiple mental disorders ( $\geq 2$ )                                   | 290(66.1) | 288(50.4) | <b>&lt;.001</b> |
| PTSD                                                                     | 215(49.0) | 147(25.8) | <b>&lt;.001</b> |
| Current suicidality (high)                                               | 381(86.8) | 439(76.9) | <b>&lt;.001</b> |
| <b>Chronic Disease and Service Access</b>                                |           |           |                 |
| Blood borne diseases                                                     | 122(28.1) | 148(26.1) | .488            |
| Two or more physical illness                                             | 389(88.6) | 471(82.5) | <b>.007</b>     |
| Have a regular medical doctor                                            | 299(68.1) | 358(62.8) | .080            |
| Place you usually go when you are sick or need advice about your health  | 373(85.4) | 452(80.3) | <b>.036</b>     |
| Needed health care, but did not receive it in past 6 months              | 224(51.7) | 263(47.3) | .167            |
| <b>Substance Use</b>                                                     |           |           |                 |
| Current alcohol dependence                                               | 290(66.1) | 153(26.8) | <b>&lt;.001</b> |
| Current Substance dependence                                             | 240(54.7) | 289(50.6) | .201            |
| Age first alcohol use (categorized by median) ( $\geq 14$ ; $\leq 13$ )  | 173(40.6) | 301(55.4) | <b>&lt;.001</b> |
|                                                                          | 253(59.4) | 242(44.6) |                 |
| Age first drug use (After $\geq 14$ ; $\leq 13$ )                        | 197(47.5) | 327(63.1) | <b>&lt;.001</b> |
|                                                                          | 218(52.5) | 191(36.9) |                 |
| GAIN Score - (0-3 less severe); (4-5 severe) substance use in past month | 248(60.3) | 405(75.4) | <b>&lt;.001</b> |
|                                                                          | 163(39.7) | 132(24.6) |                 |

**Table 3: Logistic Regression analysis to estimate the association between Indigenous Ethnicity and homelessness, mental & physical illness and service utilization among Vancouver and Winnipeg 'At home' participants (N=1010)**

| Dependent variable                                                       | Unadjusted OR (95% CI) | P Value | Adjusted <sup>2</sup> OR (95% CI) | P Value |
|--------------------------------------------------------------------------|------------------------|---------|-----------------------------------|---------|
| <b>Homelessness</b>                                                      |                        |         |                                   |         |
| Age first homeless (<25 years)                                           | 1.54 (1.19, 1.98)      | .001*   | 1.56 (1.06, 2.27)                 | .023*   |
| Lifetime duration of homelessness (More or less than 3 years)            | 1.36 (1.05, 1.75)      | .018*   | 1.41 (1.01, 2.0)                  | .041*   |
| Longest single episode of homelessness (1 year or more)                  | 1.26 (0.98, 1.63)      | .074    | 1.10 (0.79, 1.52)                 | .590    |
| <b>Mental Illness</b>                                                    |                        |         |                                   |         |
| PTSD                                                                     | 2.76 (2.12, 3.60)      | <.001*  | 1.91 (1.35, 2.70)                 | <.001*  |
| Multiple mental disorders (≥2)                                           | 1.91 (1.48, 2.47)      | <.001*  | 1.27 (0.90, 1.78)                 | .169    |
| Less severe mental disorder                                              | 3.92 (2.89, 5.32)      | <.001*  | 1.72 (1.16, 2.56)                 | .008*   |
| Severe mental disorder                                                   | 0.46 (0.35, 0.59)      | <.001*  | 0.73 (0.50, 1.07)                 | .104    |
| <b>Substance Use</b>                                                     |                        |         |                                   |         |
| Current alcohol dependence                                               | 5.32 (4.06, 6.97)      | <.001*  | 2.64 (1.90, 3.68)                 |         |
| Current substance dependence                                             | 1.18 (0.92, 1.51)      | .201    | 1.31 (0.92, 1.86)                 | .132    |
| Age first alcohol use (After ≥ 14; ≤13)                                  | 1.82 (1.41, 2.35)      | <.001*  | 1.35 (0.97, 1.87)                 | .077    |
| Age first drug use (After ≥ 14; ≤13)                                     | 1.90 (1.46, 2.46)      | <.001*  | 1.68 (1.20, 2.37)                 | .003*   |
| GAIN Score - (0-3 less severe); (4-5 severe) substance use in past month | 2.02 (1.53, 2.67)      | <.001*  | 2.43 (1.67, 3.56)                 | <.001*  |
| <b>Chronic Disease</b>                                                   |                        |         |                                   |         |
| Infectious (Blood Borne) disease - HIV, HEP C, HBV                       | 1.10 (0.83, 1.46)      | .489    | 1.59 (1.08, 2.34)                 | .018*   |
| Multiple comorbid conditions (2 or more)                                 | 1.65 (1.15, 2.40)      | .007*   | 1.02 (0.64, 1.64)                 | .923    |
| Three or more physical conditions                                        | 1.90 (1.41, 2.60)      | <.001*  | 1.28 (0.87, 1.90)                 | .212    |
| <b>Service Use</b>                                                       |                        |         |                                   |         |
| Have regular medical doctor                                              | 1.27 (0.97, 1.65)      | .080    | 1.49 (1.05, 2.10)                 | .024*   |
| Needed health care but didn't receive it in past 6 months                | 1.19 (0.93, 1.54)      | .167    | 0.79 (0.57, 1.10)                 | .166    |
| Taken to ER in P6M                                                       | 1.21 (0.94, 1.56)      | .145    | 1.37 (0.99, 1.92)                 | .062    |
| Multiple ER visit (>1 visit)                                             | 0.89 (0.68, 1.16)      | .382    | 1.07 (0.75, 1.51)                 | .719    |
| Taken by ambulance to hospital P6M                                       | 1.29 (1.0, 1.67)       | .052    | 1.86 (1.32, 2.61)                 | <.001*  |
| Arrested P6M                                                             | 0.89 (0.68, 1.17)      | .416    | 1.10 (0.76, 1.60)                 | .604    |
| Court Appearances P6M                                                    | 0.95 (0.73, 1.25)      | .717    | 1.06 (0.74, 1.52)                 | .761    |

<sup>2</sup> - Controlled for age (continuous), gender (male, female), need level (high, moderate), marital status (single, other), site (Vancouver, Winnipeg), education (high school or higher, less than high school) and have children (under 18).

|                                                                                                              |                   |      |                   |      |
|--------------------------------------------------------------------------------------------------------------|-------------------|------|-------------------|------|
| Participated in justice service programs (eg. drug treatment court, mental health court, Indigenous justice) | 1.30 (0.86, 1.96) | .218 | 1.13 (0.66, 1.94) | .652 |
|--------------------------------------------------------------------------------------------------------------|-------------------|------|-------------------|------|

\* $p \leq 0.05$

\*Controlled for age (continuous), gender (male, female), need level (high, moderate), marital status (single, other), site (Vancouver, Winnipeg), education (high school or higher, less than high school), have children (under 18).

For peer review only

**Contributorship Statement:**

BB is the lead in the development of the manuscript. AM carried out the primary statistical analyses. MP, JD, JS and JO contributed to the editing of the manuscript. JS was the principal investigator, contributed to the research design and writing of the manuscript. All authors read and approved the final manuscript.

**Competing Interests:**

The authors declare that they have no competing interests.

**Funding:**

This work was supported by a grant to Simon Fraser University from Health Canada and the Mental Health Commission of Canada. The views expressed herein solely represent the authors.

**Patient Consent:** Obtained.

**Ethics Approval:** Office of Research Ethics, Simon Fraser University and the Health Research Ethics Board at the University of Manitoba.

**Acknowledgments:**

The research team would like to extend thanks to the participants, service providers and field research teams. The authors also thank the At Home/Chez Soi Project Collaborative.

**Data Sharing:**

Data is stored at St. Michael's Hospital in Toronto and is available to external investigators who sign a Data Sharing and Use Agreement that stipulates the responsibilities associated with transfer of datasets. Dr. Carol Adair at the University of Calgary is the data access coordinator.

## References

- 1 Anderson JT, Collins D. Prevalence and causes of urban homelessness among indigenous peoples: A three-country scoping review. *Hous Stud* 2014;**29**:959–76. doi:10.1080/02673037.2014.923091
- 2 Patrick C. Aboriginal Homelessness in Canada. Toronto, ON: Canadian Homelessness Research Network Press 2014. <https://www.homelesshub.ca/sites/default/files/AboriginalLiteratureReview.pdf>
- 3 City of Vancouver. 2018 Homeless Count. Vancouver, BC: 2018. <http://vancouver.ca/people-programs/homeless-count.aspx>
- 4 Statistics Canada. Issue 17-138: 2016 Census: Highlights from the Indigenous People in Canada Release. 2016. <https://www2.gov.bc.ca/gov/content/data/statistics/infoline/infoline-2017/17-138-2016-census-indigenous-people-canada>.
- 5 Bird C, Goulet S, Oelke ND, *et al*. Aboriginal Homelessness Research Project. Calgary, AB: Aboriginal Friendship Centre of Calgary 2010. [https://www.ucalgary.ca/wethurston/files/wethurston/Aboriginal\\_Homelessness\\_GatheringReport\\_March2010.pdf](https://www.ucalgary.ca/wethurston/files/wethurston/Aboriginal_Homelessness_GatheringReport_March2010.pdf)
- 6 Perissini T. Pathways into Homelessness: Testing the Heterogeneity Hypothesis. In: Hulchanski DJ, Campsie P, Chau S, *et al*, eds. *Finding Home Policy Options for Addressing Homelessness in Canada*. Toronto, ON: 2009. 1–17.
- 7 Somers JM, Moniruzzaman A, Rezansoff SN. Migration to the downtown eastside neighbourhood of vancouver and changes in service use in a cohort of mentally ill homeless adults: a 10-year retrospective study. *BMJ Open* 2016;**6**:e009043–9. doi:10.1136/bmjopen-2015-009043
- 8 Evans GW, Wells NM, Moch A. Housing and Mental Health: A Review of the Evidence and a Methodological and Conceptual Critique. *J Soc Issues* 2003;**59**:475–500.
- 9 Forchuk C, Joplin L, Schofield R, *et al*. Housing, Income Support and Mental Health: Points of Disconnection. *Health Res Policy and Sys* 2007 *5*:1 2007;**5**:14–7. doi:10.1186/1478-4505-5-14
- 10 Nelson G. Housing for People with Serious Mental Illness: Approaches, Evidence, and Transformative Change. *Jl of Soc Soc Welf* 2010;**XXXVII**:123–46.
- 11 Canadian Collaborative Mental Health Initiative. Establishing collaborative initiatives between mental health and primary care services for individuals with substance use disorders. Mississauga, ON: 2006. [www.ccmhi.ca](http://www.ccmhi.ca)
- 12 Turner D, Goulet S, Oelke ND, *et al*. Aboriginal homelessness: Looking for a place to belong. Calgary, AB: Aboriginal Friendship Centre of Calgary 2010.
- 13 Truth and Reconciliation Commission of Canada. What We Have Learned: Principles of Truth and Reconciliation. Winnipeg, MB: 2015. [www.trc.ca](http://www.trc.ca)
- 14 John E. Indigenous Resilience, Connectedness and Reunification - From Root Causes to Root Solutions. 2016:1–220. <http://fns.bc.ca/wp-content/uploads/2017/01/Final-Report-of-Grand->

Chief-Ed-John-re-Indig-Child-Welfare-in-BC-November-2016.pdf

- 15 Thistle J. Indigenous Definition of Homelessness in Canada. Toronto, ON: Canadian Observatory on Homelessness Press 2017.
- 16 Browne AJ, Smye VL, Rodney P, *et al.* Access to primary care from the perspective of aboriginal patients at an urban emergency department. *Qual Health Res* 2011;**21**:333–48. doi:10.1177/1049732310385824
- 17 Browne AJ, Varcoe C, Lavoie J, *et al.* Enhancing health care equity with indigenous populations: evidence-based strategies from an ethnographic study. *BMC Health Serv Res* 2016;**1**–17. doi:10.1186/s12913-016-1707-9
- 18 Allan B, Smylie J. First Peoples, Second Class Treatment: The Role of Racism in the Health and Well-being of Indigenous Peoples in Canada. Toronto, ON: 2015.
- 19 Tang SY, Browne AJ. 'Race' matters: racialization and egalitarian discourses involving aboriginal people in the canadian health care context. *Ethn Health* 2008;**13**:109–27. doi:10.1080/13557850701830307
- 20 Rog DJ, Marshall T, Dougherty RH, *et al.* Permanent supportive housing: assessing the evidence. *Psych Serv* 2014;**65**:287–94. doi:10.1176/appi.ps.201300261)
- 21 Goering PN, Streiner DL, Adair CE, *et al.* The at home/chez soi trial protocol: a pragmatic, multi-site, randomised controlled trial of a housing first intervention for homeless individuals with mental illness in five canadian cities. *BMJ Open* 2011;**1**:e000323–3. doi:10.1136/bmjopen-2011-000323
- 22 Somers JM, Patterson ML, Moniruzzaman A, *et al.* Vancouver at home: pragmatic randomized trials investigating housing first for homeless and mentally ill adults. *Trials* 2013;**14**:1–20. doi:10.1186/1745-6215-14-365
- 23 Strehlau V, Torchalla I, Patterson ML, *et al.* Recruitment and retention of homeless individuals with mental illness in a housing first intervention study. *Contemporary Clinical Trials Communications* 2017;**7**:48–56. doi:10.1016/j.conctc.2017.05.001
- 24 Sheehan D, Lecrubier Y, Sheehan KH, *et al.* The mini-international neuropsychiatric interview (M.I.N.I.): the development and validation of a structured diagnostic psychiatric interview for DSM-IV and ICD-10. *J Clin Psych* 1998;**59**:22–3.
- 25 Somers JM, Moniruzzaman A, Currie LB, *et al.* Accuracy of reported service use in a cohort of people who are chronically homeless and seriously mentally ill. *BMC Psychiatry* 2016;**16**:1–7. doi:10.1186/s12888-016-0758-0
- 26 Barker S, Barron N, McFarland BH, *et al.* A Community ability scale for chronically mentally ill consumers: part II. applications. *Community Ment Health J* 1994;**30**:459–72.
- 27 Roos LE, Distasio J, Bolton S-L, *et al.* A history in-care predicts unique characteristics in a homeless population with mental illness. *Child Abuse Negl* 2014;**38**:1618–27. doi:10.1016/j.chiabu.2013.08.018
- 28 Patterson ML. History of foster care among homeless adults with mental illness in vancouver,

- 1  
2  
3 British Columbia: a precursor to trajectories of risk. *BMC Psych* 2015;**15**:1–11.  
4 doi:10.1186/s12888-015-0411-3  
5
- 6 29 Aguiar W, Halseth R. Aboriginal peoples and historic trauma: The process of intergenerational  
7 transmission. National Collaborating Centre for Aboriginal Health 2015: 1-32.  
8 [https://www.ccsa-nccah.ca/docs/context/RPT-HistoricTrauma-IntergenTransmission-](https://www.ccsa-nccah.ca/docs/context/RPT-HistoricTrauma-IntergenTransmission-Aguiar-Halseth-EN.pdf)  
9 [Aguiar-Halseth-EN.pdf](https://www.ccsa-nccah.ca/docs/context/RPT-HistoricTrauma-IntergenTransmission-Aguiar-Halseth-EN.pdf).  
10
- 11 30 Bombay A, Matheson K, Anisman H. Intergenerational Trauma: Convergence of Multiple  
12 Processes among First Nations Peoples in Canada. *J Aborig Health* 2009:1–42.  
13
- 14 31 Wesley-Esquimaux CC, Smolewski M. Historic Trauma and Aboriginal Healing. Ottawa, ON:  
15 Aboriginal Healing Foundation 2004.  
16
- 17 32 Canadian Centre on Substance Abuse. Substance Abuse in Canada: Youth in Focus. Ottawa, ON:  
18 CCSA 2007:1–51.  
19
- 20 33 Kelly M. Prevention of the Harmful Effects of Substance Use Among Aboriginal Peoples: An  
21 Initial Review of the Research Literature. Victoria, BC: Centre for Addictions Research of BC  
22 2007.  
23
- 24 34 Miller CL, Strathdee SA, Kerr T, *et al*. Factors associated with early adolescent initiation into  
25 injection drug use: implications for intervention programs. *J Adolesc Health* 2006;**38**:462–4.  
26 doi:10.1016/j.jadohealth.2005.03.004  
27
- 28 35 Rawana JS, Ames ME. Protective predictors of alcohol use trajectories among canadian  
29 aboriginal youth. *J Youth Adolescence* 2011;**41**:229–43. doi:10.1007/s10964-011-9716-9  
30
- 31 36 McCormick RM. Aboriginal Traditions in the Treatment of Substance Abuse. *Can J Counsel*  
32 2000;**34**:25–32.  
33
- 34 37 Thomson M. Vancouver Homeless Count 2016. Vancouver, BC: City of Vancouver 2016: 1-54.  
35 <http://vancouver.ca/files/cov/homeless-count-2016-report.pdf>.  
36
- 37 38 Fowler PJ, Toro PA, Miles BW. Pathways to and from homelessness and associate psychosocial  
38 outcomes among adolescents leaving the foster care system. *Am J Public Health* 2009;**99**:1453–  
39 8. doi:10.2105/AJPH.2008.142547)  
40
- 41 39 Marshall BDL, Kerr T, Livingstone C, *et al*. High prevalence of HIV infection among homeless  
42 and street-involved aboriginal youth in a canadian setting. *Harm Reduct J* 2008;**5**:35–5.  
43 doi:10.1186/1477-7517-5-35  
44
- 45 40 Monette LE, Rourke SB, Gibson K, *et al*. Inequalities in determinants of health among aboriginal  
46 and caucasian persons living with HIV/AIDS in ontario: results from the positive spaces,  
47 healthy places study. *Can J Public Health* 2011;**102**:216–9.  
48  
49  
50  
51  
52  
53  
54  
55  
56  
57  
58  
59  
60
